# Supplementary material for: Tumor purity as a prognosis and immunotherapy relevant feature in cervical cancer
Source: publisher site journal article supplement (doi:10.18632/aging.203714), 2021-11-29
Supplement: Supplementary file [file aging-v13i22-203714-supplementary-material-SD1.pdf]

**SUPPLEMENTARY FIGURES**

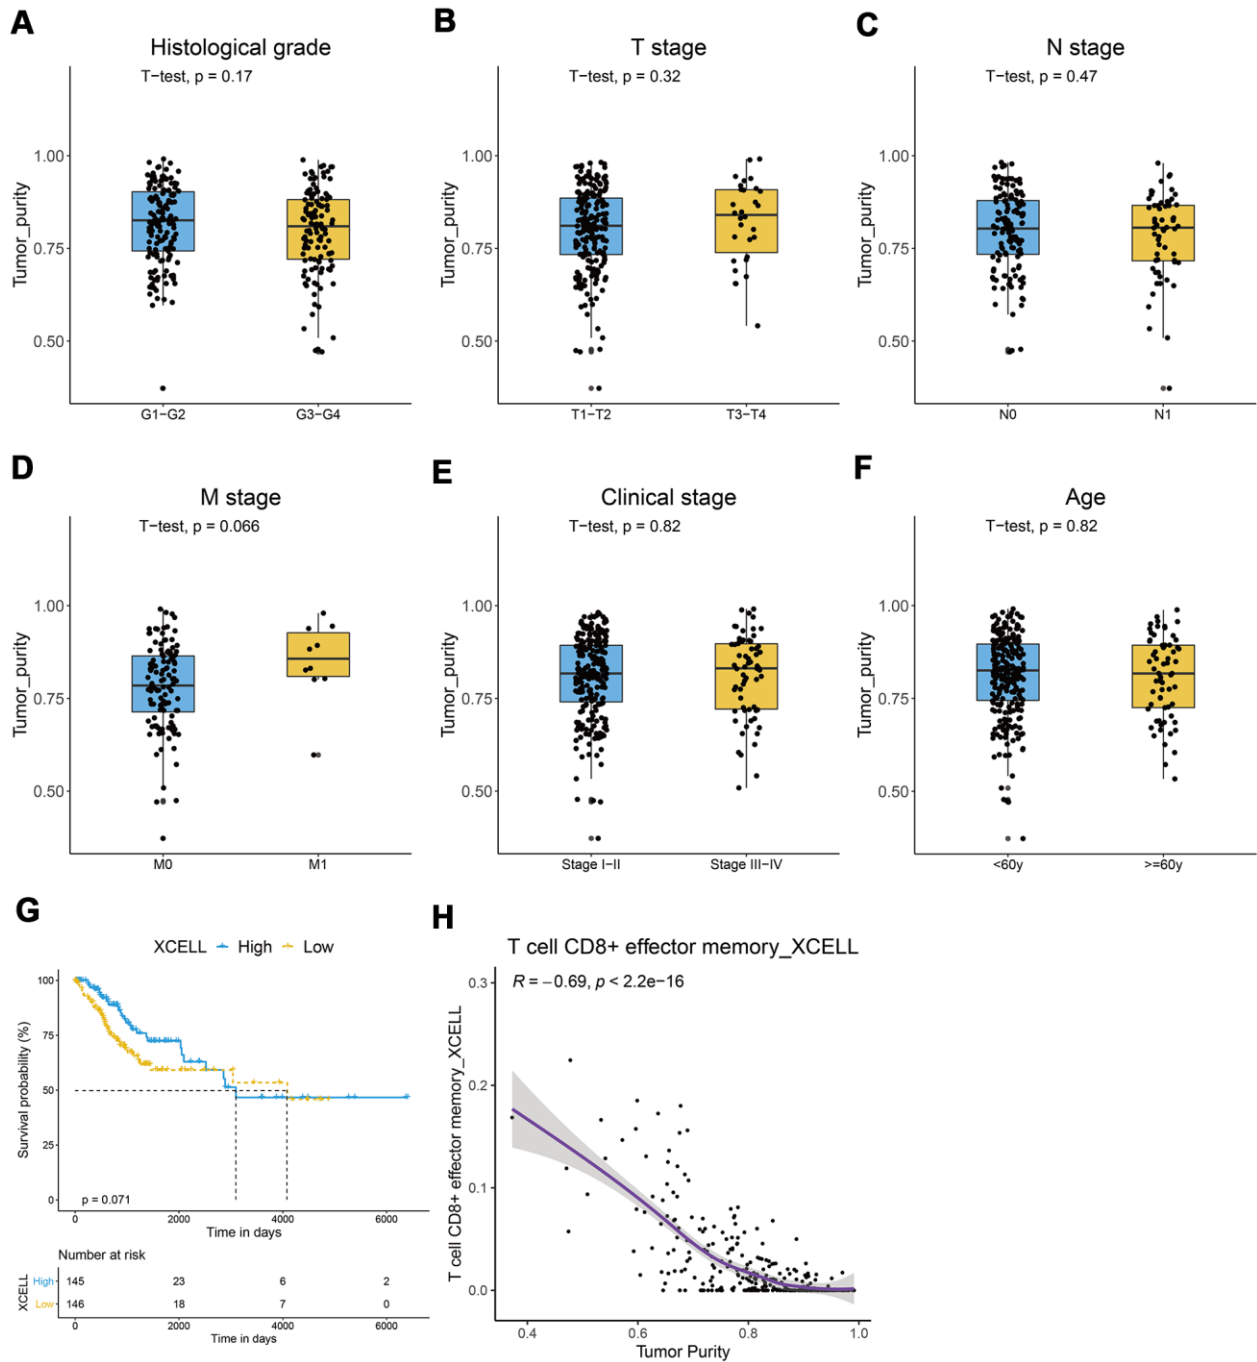

**Supplementary Figure 1. Correlation between tumor purity and immunity in CESC. (A–F)** Tumor purity was not significantly associated with histological grade, TNM stage, clinical stage, and age. **(G)** A Kaplan–Meier analysis suggested that the effect memory CD8 T cell was not significantly associated with CESC prognosis. **(H)** The effect memory CD8 T cell was significantly associated with tumor purity.

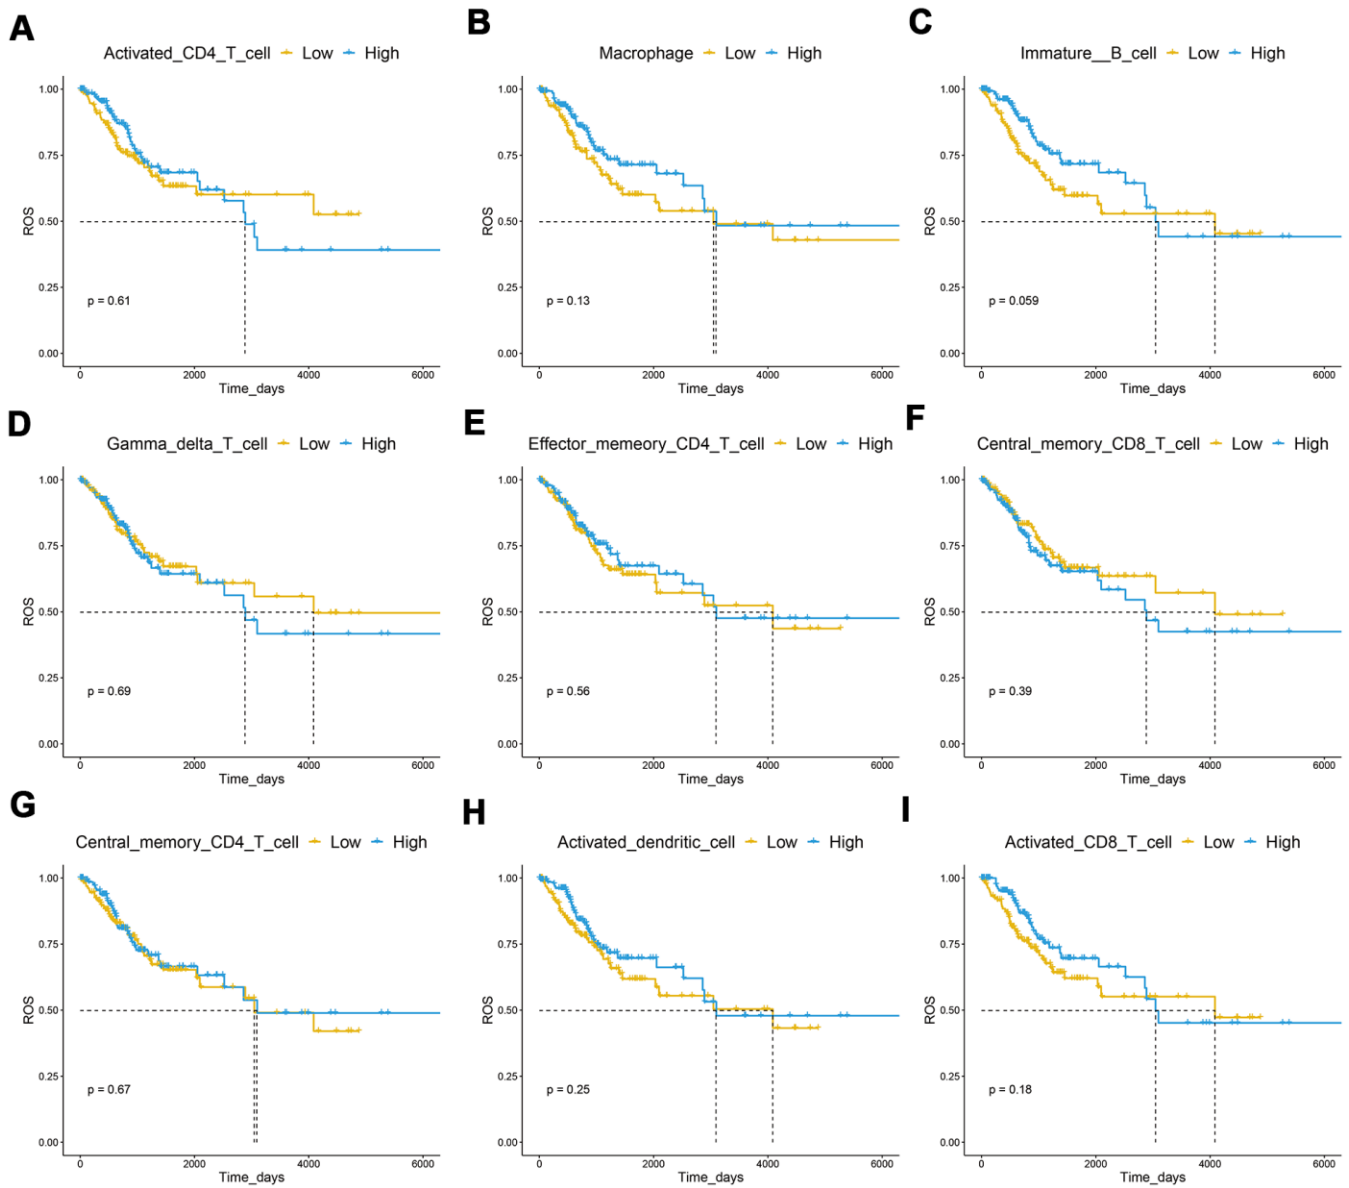

**Supplementary Figure 2. The correlation between the immune cell infiltration level and OS.** (A–I) A Kaplan–Meier analysis showed that activated CD4 T cell, macrophage, immature B cell, gamma delta T cell, effector memory CD4 T cell, central memory CD8 T cell, central memory CD4 T cell, activated dendritic cell, and activated CD8 T cell were not significantly associated with CESC overall survival.

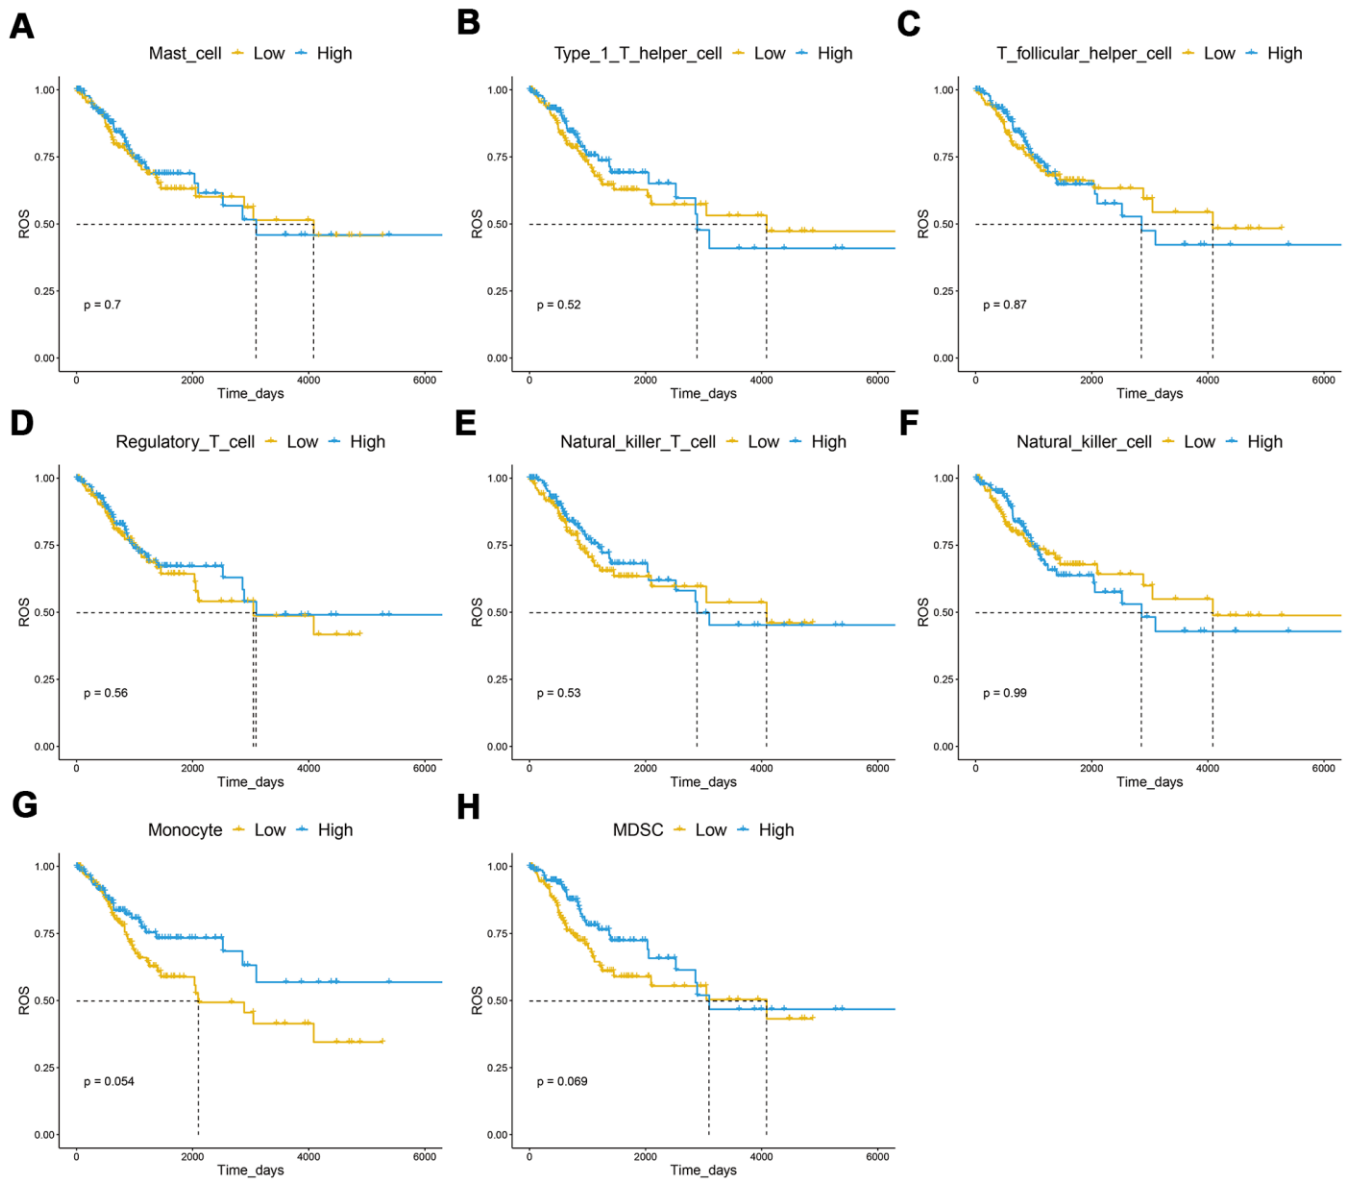

**Supplementary Figure 3. The correlation between the infiltration level of immune cells and prognosis.** (A–H) A Kaplan–Meier analysis showed that the mast cell, type 1 T helper cell, T follicular helper cell, regulatory T cell, natural killer T cell, natural killer cell, monocyte, and MDSC were not significantly associated with CESC overall survival.
