# Supplementary material for: Tumor purity as a prognosis and immunotherapy relevant feature in cervical cancer
Source: Aging (Albany NY). 2021 Nov 29;13(22):24768–85. doi: 10.18632/aging.203714 (PMC8660621; doi:10.18632/aging.203714)
Supplement: Supplementary Table 1 [file aging-13-203714-s002.xlsx]

## Sheet: Supplementary Table 1
Supplementary Table 1. Tumor purity of CESC, OV, UCEC, and UCS.
TCGA_CESC		TCGA_UCEC		TCGA_OV		TCGA_UCS
sample	Tumor_purity	sample	Tumor_purity	sample	Tumor_purity	sample	Tumor_purity
TCGA.EK.A2RO.01A	0.811973	TCGA.AX.A06J.01	0.91057	TCGA.23.1120.01	0.763613	TCGA.N7.A4Y5.01	0.906161
TCGA.EK.A3GJ.01A	0.776437	TCGA.B5.A11P.01	0.954874	TCGA.29.1695.01	0.645343	TCGA.NF.A4X2.01	0.803578
TCGA.EK.A2R9.01A	0.694034	TCGA.AX.A05T.01	0.874778	TCGA.61.2003.01	0.630317	TCGA.N6.A4VD.01	0.89023
TCGA.ZJ.AAXU.01A	0.770237	TCGA.BG.A0M8.01	0.517126	TCGA.13.1404.01	0.816276	TCGA.NA.A4QY.01	0.866053
TCGA.LP.A5U2.01A	0.89572	TCGA.BG.A0LX.01	0.80383	TCGA.23.1027.01	0.756797	TCGA.N5.A4RD.01	0.923688
TCGA.EK.A2RB.01A	0.890624	TCGA.EY.A5W2.01	0.841714	TCGA.23.1022.01	0.947416	TCGA.N5.A4RM.01	0.869571
TCGA.EA.A97N.01A	0.825409	TCGA.D1.A2G0.01	0.901245	TCGA.61.2088.01	0.96956	TCGA.NF.A5CP.01	0.690797
TCGA.EK.A2PK.01A	0.654335	TCGA.AP.A053.01	0.941365	TCGA.13.1507.01	0.642998	TCGA.ND.A4WF.01	0.888337
TCGA.EK.A2PL.01A	0.904775	TCGA.A5.A0G1.01	0.619413	TCGA.61.1725.01	0.748771	TCGA.NA.A4R1.01	0.970042
TCGA.EK.A2RK.01A	0.817677	TCGA.EO.A3KW.01	0.843705	TCGA.31.1944.01	0.81191	TCGA.N6.A4VE.01	0.83245
TCGA.C5.A1MJ.01A	0.752288	TCGA.BG.A0MI.01	0.860344	TCGA.61.2092.01	0.977918	TCGA.NF.A4WU.01	0.975836
TCGA.EK.A3GK.01A	0.922876	TCGA.AJ.A3NG.01	0.950503	TCGA.29.1710.01	0.571467	TCGA.ND.A4W6.01	0.614335
TCGA.EK.A2PM.01A	0.969911	TCGA.AJ.A3OJ.01	0.804658	TCGA.36.1571.01	0.957902	TCGA.N5.A59F.01	0.779692
TCGA.ZJ.AAX4.01A	0.702687	TCGA.A5.A2K5.01	0.824041	TCGA.23.1118.01	0.809846	TCGA.N8.A56S.01	0.902171
TCGA.LP.A5U3.01A	0.840368	TCGA.AX.A1C7.01	0.922173	TCGA.29.1694.01	0.793362	TCGA.N7.A4Y8.01	0.938556
TCGA.EK.A2R7.01A	0.813049	TCGA.D1.A167.01	0.966845	TCGA.25.1318.01	0.81524	TCGA.N8.A4PL.01	0.944025
TCGA.LP.A4AW.01A	0.772207	TCGA.B5.A11X.01	0.704044	TCGA.25.1870.01	0.858472	TCGA.NG.A4VU.01	0.864899
TCGA.EK.A3GN.01A	0.969675	TCGA.BS.A0V4.01	0.838448	TCGA.23.1028.01	0.870884	TCGA.N5.A59E.01	0.866497
TCGA.FU.A770.01A	0.895464	TCGA.DF.A2L0.01	0.787408	TCGA.24.1469.01	0.917829	TCGA.NF.A4WX.01	0.917026
TCGA.DG.A2KH.01A	0.977774	TCGA.BK.A6W3.01	0.80008	TCGA.29.1705.01	0.762982	TCGA.N6.A4VF.01	0.48368
TCGA.ZJ.AAXA.01A	0.893479	TCGA.FI.A2EU.01	0.980095	TCGA.13.1410.01	0.80279	TCGA.NA.A4R0.01	0.580012
TCGA.EK.A2R8.01A	0.865574	TCGA.AX.A3FS.01	0.881605	TCGA.24.1426.01	0.901565	TCGA.N5.A4RJ.01	0.852372
TCGA.FU.A3TX.01A	0.842856	TCGA.D1.A17R.01	0.872641	TCGA.20.1687.01	0.779527	TCGA.N8.A4PQ.01	0.698926
TCGA.EK.A2PG.01A	0.950782	TCGA.AJ.A5DW.01	0.884076	TCGA.13.0884.01	0.764416	TCGA.QM.A5NM.01	0.924421
TCGA.EK.A2RM.01A	0.844021	TCGA.EY.A1GH.01	0.891292	TCGA.13.1489.01	0.964145	TCGA.N6.A4VC.01	0.968407
TCGA.VS.A9UJ.01A	0.97087	TCGA.AP.A1DM.01	0.906071	TCGA.29.1697.01	0.969934	TCGA.N9.A4Q7.01	0.613962
TCGA.EK.A2RJ.01A	0.753239	TCGA.BG.A0MS.01	0.858344	TCGA.04.1362.01	0.902173	TCGA.N8.A4PP.01	0.795969
TCGA.EK.A2RE.01A	0.933072	TCGA.E6.A1LZ.01	0.901035	TCGA.29.1688.01	0.680135	TCGA.N9.A4PZ.01	0.855006
TCGA.EK.A2RN.01A	0.781743	TCGA.B5.A11E.01	0.920705	TCGA.25.1313.01	0.709625	TCGA.N5.A4RO.01	0.96767
TCGA.C5.A1MK.01A	0.750951	TCGA.FI.A2F9.01	0.944168	TCGA.24.1616.01	0.92665	TCGA.ND.A4WA.01	0.91483
TCGA.C5.A7X8.01A	0.73473	TCGA.BG.A0YV.01	0.933629	TCGA.24.2281.01	0.741024	TCGA.ND.A4WC.01	0.870283
TCGA.PN.A8MA.01A	0.815676	TCGA.AP.A1DR.01	0.914585	TCGA.61.1736.01	0.825706	TCGA.N7.A4Y0.01	0.948457
TCGA.JW.A5VH.01A	0.938527	TCGA.AP.A0LG.01	0.951878	TCGA.29.1774.01	0.963873	TCGA.N8.A4PO.01	0.797665
TCGA.VS.A9UV.01A	0.91926	TCGA.BG.A186.01	0.840833	TCGA.25.1326.01	0.692279	TCGA.N8.A4PI.01	0.829521
TCGA.C5.A1MP.01A	0.592367	TCGA.AX.A1CK.01	0.961003	TCGA.13.0726.01	0.85734	TCGA.N8.A4PN.01	0.866835
TCGA.ZX.AA5X.01A	0.604321	TCGA.AX.A2HC.01	0.959975	TCGA.10.0937.01	0.808421	TCGA.N7.A59B.01	0.834356
TCGA.EK.A2RC.01A	0.716287	TCGA.BG.A18C.01	0.899628	TCGA.24.2023.01	0.864557	TCGA.N8.A4PM.01	0.874176
TCGA.VS.A9V4.01A	0.944063	TCGA.EY.A2OQ.01	0.892909	TCGA.25.1320.01	0.738124	TCGA.NA.A4QX.01	0.797308
TCGA.VS.A94Y.01A	0.83203	TCGA.DF.A2KR.01	0.898353	TCGA.13.1498.01	0.77127	TCGA.N5.A4RS.01	0.96247
TCGA.C5.A902.01A	0.815616	TCGA.FI.A3PV.01	0.966093	TCGA.13.0725.01	0.755029	TCGA.NG.A4VW.01	0.959825
TCGA.VS.A9V1.01A	0.911415	TCGA.AJ.A23M.01	0.900595	TCGA.23.1119.01	0.755612	TCGA.N6.A4V9.01	0.897938
TCGA.C5.A1BN.01B	0.952275	TCGA.A5.A0R7.01	0.707049	TCGA.25.1315.01	0.975885	TCGA.N5.A4RN.01	0.865227
TCGA.EK.A2IP.01A	0.897577	TCGA.BG.A0W2.01	0.829801	TCGA.23.1123.01	0.754304	TCGA.N9.A4Q4.01	0.887586
TCGA.EA.A50E.01A	0.719304	TCGA.PG.A5BC.01	0.909824	TCGA.24.1551.01	0.75106	TCGA.N5.A4RU.01	0.843412
TCGA.EX.A1H6.01B	0.890437	TCGA.5B.A90C.01	0.931579	TCGA.61.1737.01	0.709896	TCGA.N6.A4VG.01	0.856556
TCGA.DS.A7WI.01A	0.86523	TCGA.A5.A0GU.01	0.847066	TCGA.25.1317.01	0.895131	TCGA.N5.A4RA.01	0.938299
TCGA.JW.A852.01A	0.873157	TCGA.A5.A1OF.01	0.72258	TCGA.30.1892.01	0.703277	TCGA.N9.A4Q3.01	0.898342
TCGA.EX.A69M.01A	0.773659	TCGA.AX.A1CE.01	0.945397	TCGA.25.1329.01	0.801738	TCGA.N5.A4RF.01	0.746881
TCGA.C5.A8XI.01A	0.817269	TCGA.EY.A215.01	0.927433	TCGA.10.0928.01	0.951142	TCGA.N5.A4RV.01	0.866563
TCGA.MA.AA42.01A	0.571883	TCGA.EY.A1GT.01	0.87844	TCGA.61.2000.01	0.804544	TCGA.N9.A4Q1.01	0.865186
TCGA.DS.A1O9.01A	0.654789	TCGA.AP.A0LI.01	0.691047	TCGA.29.1781.01	0.6757	TCGA.NA.A4QW.01	0.89326
TCGA.Q1.A6DT.01A	0.906403	TCGA.B5.A1MW.01	0.967069	TCGA.61.2002.01	0.614988	TCGA.N5.A4RT.01	0.927596
TCGA.MA.AA41.01A	0.883038	TCGA.AX.A0IW.01	0.90598	TCGA.61.2098.01	0.971518	TCGA.NA.A5I1.01	0.781912
TCGA.Q1.A73Q.01A	0.916471	TCGA.EY.A2ON.01	0.873108	TCGA.31.1956.01	0.423109	TCGA.N5.A4R8.01	0.944656
TCGA.C5.A7X3.01A	0.72521	TCGA.B5.A11G.01	0.838132	TCGA.24.1549.01	0.855661	TCGA.NA.A4QV.01	0.807893
TCGA.HM.A6W2.01A	0.826515	TCGA.QS.A5YR.01	0.75624	TCGA.24.2038.01	0.917527
TCGA.VS.A8EB.01A	0.831184	TCGA.BS.A0U5.01	0.919435	TCGA.24.1427.01	0.693774
TCGA.FU.A5XV.01A	0.884274	TCGA.SL.A6J9.01	0.720851	TCGA.25.1628.01	0.631748
TCGA.LP.A4AU.01A	0.830426	TCGA.EO.A1Y7.01	0.931364	TCGA.29.1693.01	0.779678
TCGA.MA.AA43.01A	0.835074	TCGA.BS.A0UJ.01	0.832893	TCGA.24.2035.01	0.538652
TCGA.C5.A0TN.01A	0.867345	TCGA.AX.A1C8.01	0.942613	TCGA.24.1845.01	0.878349
TCGA.VS.A8QC.01A	0.830007	TCGA.DF.A2KY.01	0.793086	TCGA.24.1842.01	0.71857
TCGA.UC.A7PD.01A	0.89311	TCGA.B5.A11L.01	0.725839	TCGA.24.2288.01	0.725421
TCGA.EA.A44S.01A	0.788641	TCGA.EO.A1Y8.01	0.931	TCGA.13.1403.01	0.890115
TCGA.UC.A7PG.01A	0.865436	TCGA.FI.A2F4.01	0.820625	TCGA.61.1914.01	0.788267
TCGA.FU.A23K.01A	0.720032	TCGA.AJ.A2QL.01	0.79483	TCGA.23.1809.01	0.930627
TCGA.DS.A1OC.01A	0.820722	TCGA.BS.A0VI.01	0.82865	TCGA.24.0966.01	0.893335
TCGA.LP.A4AX.01A	0.656436	TCGA.AP.A0LF.01	0.720072	TCGA.04.1365.01	0.798667
TCGA.EK.A2GZ.01A	0.883472	TCGA.EY.A549.01	0.91319	TCGA.29.1690.01	0.662566
TCGA.EA.A3QD.01A	0.508765	TCGA.B5.A11U.01	0.728707	TCGA.29.1711.01	0.747122
TCGA.LP.A7HU.01A	0.771192	TCGA.B5.A11W.01	0.860269	TCGA.09.2056.01	0.802941
TCGA.EA.A78R.01A	0.74925	TCGA.B5.A0JS.01	0.759113	TCGA.25.1626.01	0.481522
TCGA.C5.A7X5.01A	0.937681	TCGA.AX.A06B.01	0.787706	TCGA.13.0800.01	0.987383
TCGA.FU.A40J.01A	0.809596	TCGA.B5.A0JY.01	0.813326	TCGA.04.1361.01	0.807685
TCGA.Q1.A73O.01A	0.811271	TCGA.D1.A3JP.01	0.760624	TCGA.13.1497.01	0.849463
TCGA.VS.A9UL.01A	0.988656	TCGA.D1.A16V.01	0.842427	TCGA.24.1103.01	0.956166
TCGA.VS.A9UU.01A	0.924176	TCGA.DF.A2KV.01	0.827662	TCGA.24.1546.01	0.668315
TCGA.RA.A741.01A	0.733727	TCGA.EY.A1GS.01	0.920368	TCGA.13.0891.01	0.899592
TCGA.EX.A449.01A	0.944854	TCGA.AP.A1E0.01	0.877373	TCGA.09.2053.01	0.796026
TCGA.C5.A907.01A	0.827236	TCGA.BS.A0UT.01	0.893738	TCGA.24.2261.01	0.680797
TCGA.EA.A556.01A	0.863458	TCGA.A5.A0GI.01	0.878207	TCGA.61.1900.01	0.950882
TCGA.HM.A4S6.01A	0.695572	TCGA.BG.A0VX.01	0.762216	TCGA.29.1783.01	0.73393
TCGA.EX.A3L1.01A	0.770417	TCGA.A5.A1OG.01	0.877418	TCGA.23.1122.01	0.877774
TCGA.VS.AA62.01A	0.671074	TCGA.D1.A0ZQ.01	0.822673	TCGA.30.1866.01	0.859295
TCGA.C5.A7CL.01A	0.839458	TCGA.D1.A174.01	0.659678	TCGA.13.0883.01	0.704385
TCGA.EX.A8YF.01A	0.781096	TCGA.EY.A1GK.01	0.792081	TCGA.13.1487.01	0.866043
TCGA.Q1.A5R1.01A	0.905069	TCGA.EY.A1GX.01	0.989009	TCGA.24.1604.01	0.873727
TCGA.JW.A5VL.01A	0.779335	TCGA.FI.A2EW.01	0.918936	TCGA.13.1501.01	0.828955
TCGA.VS.A953.01A	0.904052	TCGA.D1.A17H.01	0.771724	TCGA.09.1659.01	0.809254
TCGA.VS.A9UT.01A	0.533313	TCGA.B5.A0K1.01	0.946221	TCGA.29.1770.01	0.787813
TCGA.Q1.A73P.01A	0.845029	TCGA.B5.A11N.01	0.619478	TCGA.24.1418.01	0.832528
TCGA.Q1.A5R3.01A	0.825647	TCGA.AP.A0LJ.01	0.793187	TCGA.61.2109.01	0.890965
TCGA.FU.A3EO.01A	0.818507	TCGA.A5.A0GE.01	0.818818	TCGA.29.1696.01	0.912429
TCGA.Q1.A6DV.01A	0.926128	TCGA.D1.A2G7.01	0.934377	TCGA.5X.AA5U.01	0.970957
TCGA.FU.A3WB.01A	0.91937	TCGA.B5.A121.01	0.898179	TCGA.29.1703.01	0.879105
TCGA.DS.A7WF.01A	0.885277	TCGA.BG.A0M0.01	0.949301	TCGA.29.1762.01	0.913878
TCGA.VS.A9V5.01A	0.924515	TCGA.A5.A0R9.01	0.790137	TCGA.13.0730.01	0.841724
TCGA.Q1.A5R2.01A	0.721638	TCGA.BK.A6W4.01	0.82661	TCGA.61.2008.01	0.83044
TCGA.VS.A94X.01A	0.902527	TCGA.A5.A0GH.01	0.966863	TCGA.20.1686.01	0.880687
TCGA.DS.A5RQ.01A	0.805506	TCGA.A5.A2K2.01	0.962813	TCGA.13.0906.01	0.909109
TCGA.C5.A901.01A	0.829036	TCGA.BK.A13B.01	0.880067	TCGA.13.1483.01	0.795363
TCGA.C5.A7UC.01A	0.943173	TCGA.AP.A05N.01	0.892957	TCGA.04.1357.01	0.592718
TCGA.MY.A913.01A	0.803535	TCGA.A5.A0G5.01	0.552126	TCGA.04.1331.01	0.914655
TCGA.DS.A7WH.01A	0.815106	TCGA.BK.A139.01	0.780634	TCGA.23.1109.01	0.794
TCGA.2W.A8YY.01A	0.88105	TCGA.PG.A6IB.01	0.673581	TCGA.23.1111.01	0.943992
TCGA.Q1.A6DW.01A	0.858022	TCGA.AJ.A3BD.01	0.848124	TCGA.59.2350.01	0.885342
TCGA.VS.A9V3.01A	0.813471	TCGA.D1.A16J.01	0.787284	TCGA.24.2297.01	0.943791
TCGA.GH.A9DA.01A	0.802202	TCGA.EO.A3AS.01	0.857178	TCGA.13.1509.01	0.780351
TCGA.MA.AA3Y.01A	0.697611	TCGA.EY.A1GE.01	0.814542	TCGA.24.0968.01	0.683094
TCGA.4J.AA1J.01A	0.86906	TCGA.A5.A0R6.01	0.848104	TCGA.09.2048.01	0.947064
TCGA.C5.A3HF.01A	0.814094	TCGA.EO.A3AU.01	0.828138	TCGA.29.1707.02	0.827044
TCGA.C5.A3HE.01A	0.735846	TCGA.EC.A1NJ.01	0.713011	TCGA.09.0367.01	0.859456
TCGA.JW.AAVH.01A	0.936692	TCGA.AX.A0J0.01	0.923745	TCGA.13.0924.01	0.7054
TCGA.VS.A9UY.01A	0.83128	TCGA.AJ.A3QS.01	0.814749	TCGA.24.1565.01	0.837704
TCGA.VS.A9V2.01A	0.763153	TCGA.D1.A17D.01	0.802002	TCGA.24.1467.01	0.920716
TCGA.Q1.A73R.01A	0.921216	TCGA.B5.A3FC.01	0.710054	TCGA.24.1846.01	0.758055
TCGA.C5.A1BF.01B	0.749749	TCGA.FI.A2D2.01	0.874562	TCGA.30.1862.01	0.79471
TCGA.VS.A9V0.01A	0.957848	TCGA.A5.A0GX.01	0.736109	TCGA.24.2298.01	0.818109
TCGA.FU.A2QG.01A	0.914458	TCGA.BG.A0M7.01	0.809997	TCGA.13.0901.01	0.806926
TCGA.ZJ.A8QR.01A	0.892687	TCGA.BG.A0VW.01	0.778903	TCGA.23.1021.01	0.879108
TCGA.EK.A2PI.01A	0.907267	TCGA.AX.A2HF.01	0.919874	TCGA.57.1584.01	0.860046
TCGA.MA.AA3Z.01A	0.844087	TCGA.AX.A0IU.01	0.930779	TCGA.13.A5FT.01	0.955753
TCGA.R2.A69V.01A	0.474451	TCGA.A5.A0R8.01	0.742432	TCGA.59.2354.01	0.664977
TCGA.EX.A69L.01A	0.641903	TCGA.DI.A2QU.01	0.91495	TCGA.24.2280.01	0.741635
TCGA.C5.A1BQ.01C	0.774925	TCGA.D1.A15W.01	0.830658	TCGA.25.1321.01	0.906716
TCGA.MU.A8JM.01A	0.808617	TCGA.B5.A0JN.01	0.953538	TCGA.13.0768.01	0.441086
TCGA.VS.A8EJ.01A	0.893032	TCGA.B5.A11O.01	0.750353	TCGA.13.0893.01	0.807646
TCGA.MA.AA3X.01A	0.726989	TCGA.EY.A548.01	0.844912	TCGA.36.1570.01	0.919178
TCGA.C5.A7CM.01A	0.905829	TCGA.B5.A11S.01	0.85569	TCGA.61.1910.01	0.907142
TCGA.EX.A1H5.01A	0.905189	TCGA.AX.A1CP.01	0.877867	TCGA.23.1029.01	0.907806
TCGA.C5.A3HL.01A	0.893649	TCGA.BK.A0CC.01	0.921487	TCGA.36.1580.01	0.664247
TCGA.JW.A5VK.01A	0.940738	TCGA.DI.A1BU.01	0.874323	TCGA.59.2348.01	0.8455
TCGA.HM.A3JK.01A	0.64932	TCGA.AP.A1DP.01	0.938489	TCGA.13.1495.01	0.884155
TCGA.C5.A8YT.01A	0.789759	TCGA.AX.A06F.01	0.772511	TCGA.13.0720.01	0.952676
TCGA.MY.A5BF.01A	0.796831	TCGA.B5.A3FH.01	0.898993	TCGA.25.1630.01	0.686637
TCGA.JX.A5QV.01A	0.853224	TCGA.QF.A5YT.01	0.917387	TCGA.61.1919.01	0.605383
TCGA.C5.A1ML.01A	0.85215	TCGA.B5.A1N2.01	0.853673	TCGA.13.1496.01	0.776568
TCGA.C5.A8ZZ.01A	0.817461	TCGA.EY.A1GD.01	0.920172	TCGA.29.1763.01	0.82878
TCGA.FU.A3NI.01A	0.826418	TCGA.AX.A2H8.01	0.900513	TCGA.24.1104.01	0.768796
TCGA.JX.A3PZ.01A	0.717797	TCGA.BG.A0VT.01	0.820628	TCGA.61.1907.01	0.7652
TCGA.JW.A5VJ.01A	0.89955	TCGA.AX.A2H7.01	0.931579	TCGA.13.0766.01	0.870125
TCGA.HM.A3JJ.01A	0.713483	TCGA.A5.A0VP.01	0.906916	TCGA.24.2027.01	0.957053
TCGA.MA.AA3W.01A	0.684964	TCGA.D1.A17Q.01	0.913773	TCGA.24.2024.01	0.841974
TCGA.Q1.A73S.01A	0.94846	TCGA.DI.A2QY.01	0.941163	TCGA.31.1951.01	0.698037
TCGA.DS.A3LQ.01A	0.773774	TCGA.AP.A1DO.01	0.97423	TCGA.04.1530.01	0.717902
TCGA.C5.A8YQ.01A	0.875374	TCGA.BG.A0LW.01	0.907721	TCGA.24.1419.01	0.966699
TCGA.BI.A20A.01A	0.735285	TCGA.D1.A161.01	0.894382	TCGA.29.1701.01	0.725459
TCGA.FU.A23L.01A	0.76812	TCGA.DF.A2KN.01	0.707724	TCGA.23.1026.01	0.717938
TCGA.VS.A8EI.01A	0.779947	TCGA.B5.A1MV.01	0.860878	TCGA.04.1332.01	0.776407
TCGA.EA.A6QX.01A	0.797883	TCGA.D1.A2G5.01	0.963923	TCGA.23.1113.01	0.90015
TCGA.VS.A9UD.01A	0.689721	TCGA.D1.A165.01	0.903165	TCGA.29.A5NZ.01	0.86412
TCGA.JW.A5VI.01A	0.77113	TCGA.EY.A212.01	0.942138	TCGA.20.1682.01	0.722479
TCGA.EA.A411.01A	0.746414	TCGA.AJ.A5DV.01	0.868564	TCGA.23.1107.01	0.894294
TCGA.EA.A4BA.01A	0.925711	TCGA.EY.A1GP.01	0.827899	TCGA.20.1683.01	0.899248
TCGA.EA.A3QE.01A	0.66717	TCGA.BG.A0W1.01	0.895183	TCGA.59.2352.01	0.821706
TCGA.HG.A2PA.01A	0.797373	TCGA.BG.A2AD.01	0.962074	TCGA.24.2262.01	0.791346
TCGA.EA.A5O9.01A	0.877566	TCGA.BG.A3PP.01	0.875439	TCGA.23.1114.01	0.937061
TCGA.EA.A43B.01A	0.738223	TCGA.AP.A0LT.01	0.952255	TCGA.24.1431.01	0.83965
TCGA.WL.A834.01A	0.903338	TCGA.BG.A0RY.01	0.860522	TCGA.23.2084.01	0.783702
TCGA.VS.A9UR.01A	0.944636	TCGA.BS.A0TE.01	0.882016	TCGA.04.1536.01	0.872215
TCGA.FU.A3TQ.01A	0.805199	TCGA.BS.A0V7.01	0.584672	TCGA.04.1519.01	0.961343
TCGA.EK.A2H1.01A	0.692646	TCGA.BK.A56F.01	0.837132	TCGA.24.1560.01	0.9366
TCGA.EA.A410.01A	0.824398	TCGA.BK.A26L.01	0.819297	TCGA.59.2351.01	0.722291
TCGA.EA.A5FO.01A	0.981923	TCGA.SL.A6JA.01	0.97037	TCGA.31.1953.01	0.578795
TCGA.VS.A9UC.01A	0.767343	TCGA.D1.A17A.01	0.836901	TCGA.24.1474.01	0.840339
TCGA.EA.A5ZF.01A	0.874096	TCGA.BK.A4ZD.01	0.95724	TCGA.25.1623.01	0.527604
TCGA.VS.A9UM.01A	0.715912	TCGA.AX.A05Y.01	0.944781	TCGA.13.0897.01	0.778937
TCGA.EA.A5ZE.01A	0.666613	TCGA.A5.A2K7.01	0.862363	TCGA.24.1930.01	0.598385
TCGA.VS.A8EK.01A	0.907129	TCGA.D1.A0ZP.01	0.919354	TCGA.10.0931.01	0.896686
TCGA.EA.A5ZD.01A	0.731635	TCGA.AJ.A3BF.01	0.925171	TCGA.13.0765.01	0.870642
TCGA.JW.A5VG.01A	0.827037	TCGA.BS.A0UF.01	0.747035	TCGA.04.1651.01	0.936641
TCGA.C5.A8YR.01A	0.751199	TCGA.BS.A0U9.01	0.947396	TCGA.25.2396.01	0.775073
TCGA.MU.A51Y.01A	0.645758	TCGA.AP.A05A.01	0.954089	TCGA.36.1577.01	0.933485
TCGA.DS.A1OB.01A	0.825464	TCGA.EO.A3B0.01	0.813954	TCGA.30.1857.01	0.658067
TCGA.FU.A3YQ.01A	0.642957	TCGA.D1.A175.01	0.935448	TCGA.13.1409.01	0.970278
TCGA.JW.A69B.01A	0.811548	TCGA.AX.A3G4.01	0.866163	TCGA.04.1655.01	0.976732
TCGA.DS.A1OA.01A	0.734825	TCGA.BS.A0TA.01	0.584091	TCGA.59.2355.01	0.823322
TCGA.XS.A8TJ.01A	0.806608	TCGA.B5.A0K3.01	0.910147	TCGA.61.1995.01	0.792956
TCGA.IR.A3LK.01A	0.849391	TCGA.B5.A3S1.01	0.879418	TCGA.25.1322.01	0.795005
TCGA.VS.A9UB.01A	0.691643	TCGA.KJ.A3U4.01	0.856425	TCGA.13.0905.01	0.914551
TCGA.C5.A1M8.01A	0.911494	TCGA.EO.A3B1.01	0.750738	TCGA.09.2051.01	0.832834
TCGA.EA.A3HR.01A	0.878954	TCGA.EY.A2OO.01	0.940038	TCGA.13.0900.01	0.73816
TCGA.VS.A8QM.01A	0.597562	TCGA.AJ.A3I9.01	0.940784	TCGA.61.1728.01	0.900191
TCGA.FU.A3HY.01A	0.944747	TCGA.B5.A0KB.01	0.73647	TCGA.24.1544.01	0.965838
TCGA.EA.A3HT.01A	0.727039	TCGA.AP.A1DK.01	0.767925	TCGA.04.1343.01	0.780643
TCGA.C5.A1M6.01A	0.954024	TCGA.D1.A177.01	0.973062	TCGA.24.2267.01	0.674844
TCGA.EA.A3HS.01A	0.831837	TCGA.BG.A0M3.01	0.927474	TCGA.04.1648.01	0.886289
TCGA.EA.A439.01A	0.803511	TCGA.BS.A0UV.01	0.893781	TCGA.59.2363.01	0.932225
TCGA.VS.A8Q8.01A	0.766879	TCGA.D1.A16Y.01	0.923456	TCGA.24.2290.01	0.785206
TCGA.VS.A8EH.01A	0.932425	TCGA.AJ.A3BI.01	0.800372	TCGA.13.1512.01	0.786654
TCGA.C5.A2M2.01A	0.95298	TCGA.EY.A1GF.01	0.896947	TCGA.10.0938.01	0.990836
TCGA.EA.A3HU.01A	0.653004	TCGA.D1.A17U.01	0.851848	TCGA.24.1417.01	0.672472
TCGA.VS.A94Z.01A	0.636625	TCGA.D1.A0ZZ.01	0.975737	TCGA.13.0913.02	0.768503
TCGA.C5.A1MQ.01A	0.612153	TCGA.A5.A0GD.01	0.879174	TCGA.13.2060.01	0.75499
TCGA.MU.A5YI.01A	0.685566	TCGA.AP.A05J.01	0.944388	TCGA.31.1950.01	0.864346
TCGA.C5.A1M9.01A	0.908687	TCGA.4E.A92E.01	0.798482	TCGA.13.1408.01	0.757512
TCGA.MY.A5BE.01A	0.477763	TCGA.BG.A18A.01	0.777354	TCGA.61.2113.01	0.709217
TCGA.FU.A57G.01A	0.792685	TCGA.KP.A3VZ.01	0.97327	TCGA.24.0982.01	0.888007
TCGA.C5.A1MI.01A	0.832473	TCGA.EC.A24G.01	0.772771	TCGA.61.1738.01	0.884594
TCGA.VS.A8QA.01A	0.93414	TCGA.AX.A1C4.01	0.981579	TCGA.24.2020.01	0.956662
TCGA.FU.A3HZ.01A	0.886918	TCGA.BG.A0VV.01	0.84811	TCGA.61.1733.01	0.83891
TCGA.IR.A3LL.01A	0.664081	TCGA.EY.A1G7.01	0.948865	TCGA.24.1850.01	0.77354
TCGA.C5.A1BI.01B	0.689204	TCGA.AJ.A8CT.01	0.661209	TCGA.25.2392.01	0.697591
TCGA.DS.A0VK.01A	0.876369	TCGA.BG.A0M4.01	0.842573	TCGA.24.1550.01	0.649392
TCGA.EA.A3Y4.01A	0.675544	TCGA.BG.A0VZ.01	0.81078	TCGA.25.2393.01	0.874846
TCGA.EA.A3HQ.01A	0.733929	TCGA.QS.A744.01	0.961373	TCGA.25.2404.01	0.769689
TCGA.C5.A2M1.01A	0.810326	TCGA.FI.A2D6.01	0.821281	TCGA.04.1347.01	0.943844
TCGA.C5.A1MH.01A	0.625685	TCGA.A5.A0G3.01	0.951625	TCGA.04.1338.01	0.651128
TCGA.EA.A1QS.01A	0.675787	TCGA.AX.A3G9.01	0.966378	TCGA.61.2097.01	0.770822
TCGA.VS.A8QH.01A	0.92674	TCGA.QS.A8F1.01	0.882939	TCGA.36.1568.01	0.777516
TCGA.VS.A950.01A	0.868292	TCGA.BK.A0C9.01	0.806374	TCGA.24.2036.01	0.941654
TCGA.EA.A1QT.01A	0.871067	TCGA.D1.A1O8.01	0.625184	TCGA.13.0797.01	0.867313
TCGA.VS.A94W.01A	0.711718	TCGA.BS.A0U8.01	0.887436	TCGA.57.1585.01	0.672745
TCGA.C5.A1MN.01A	0.90619	TCGA.EO.A22R.01	0.88547	TCGA.13.0727.01	0.861412
TCGA.EK.A2RA.01A	0.792757	TCGA.B5.A11Q.01	0.978231	TCGA.13.1505.01	0.8187
TCGA.VS.A9UQ.01A	0.876577	TCGA.B5.A3FD.01	0.882211	TCGA.25.2042.01	0.591504
TCGA.VS.A9U6.01A	0.801244	TCGA.AJ.A3NE.01	0.844696	TCGA.24.2289.01	0.664613
TCGA.C5.A2LS.01A	0.968474	TCGA.EY.A1GM.01	0.972027	TCGA.23.1030.01	0.847118
TCGA.JX.A3Q8.01A	0.845824	TCGA.EY.A547.01	0.955255	TCGA.13.1405.01	0.75889
TCGA.DG.A2KL.01A	0.675907	TCGA.AX.A3G7.01	0.830249	TCGA.29.2414.01	0.870511
TCGA.VS.A9UI.01A	0.829447	TCGA.D1.A16X.01	0.734054	TCGA.WR.A838.01	0.987046
TCGA.VS.A8EG.01A	0.925548	TCGA.DI.A0WH.01	0.917318	TCGA.25.2391.01	0.880802
TCGA.C5.A8XH.01A	0.806153	TCGA.EY.A2OM.01	0.855999	TCGA.13.1407.01	0.981064
TCGA.C5.A1M7.01A	0.795688	TCGA.AJ.A2QM.01	0.960671	TCGA.29.1766.01	0.739601
TCGA.VS.A8EC.01A	0.991106	TCGA.BG.A0MA.01	0.866607	TCGA.25.1328.01	0.742217
TCGA.VS.A9UH.01A	0.541183	TCGA.AP.A0LH.01	0.91238	TCGA.25.1877.01	0.850232
TCGA.VS.A9UP.01A	0.970351	TCGA.AJ.A2QO.01	0.913932	TCGA.13.0714.01	0.761123
TCGA.EK.A2RL.01A	0.931009	TCGA.D1.A17T.01	0.873278	TCGA.24.1924.01	0.692915
TCGA.VS.A9UO.01A	0.970121	TCGA.AP.A056.01	0.741366	TCGA.24.1105.01	0.833875
TCGA.VS.A9U7.01A	0.760201	TCGA.BS.A0U7.01	0.77089	TCGA.24.1430.01	0.948039
TCGA.BI.A0VR.01A	0.717571	TCGA.A5.AB3J.01	0.722149	TCGA.04.1542.01	0.960715
TCGA.VS.A958.01A	0.677303	TCGA.B5.A0JX.01	0.785242	TCGA.24.1923.01	0.832396
TCGA.VS.A9U5.01A	0.832245	TCGA.QS.A5YQ.01	0.804879	TCGA.10.0933.01	0.922032
TCGA.C5.A7XC.01A	0.742951	TCGA.AX.A062.01	0.92023	TCGA.23.1110.01	0.982818
TCGA.VS.A959.01A	0.796894	TCGA.BG.A0MC.01	0.744029	TCGA.24.1557.01	0.88746
TCGA.C5.A3HD.01B	0.963213	TCGA.D1.A0ZN.01	0.830041	TCGA.09.0366.01	0.712806
TCGA.C5.A1MF.01A	0.762154	TCGA.EY.A4KR.01	0.72344	TCGA.24.1413.01	0.900315
TCGA.VS.A8Q9.01A	0.921212	TCGA.A5.A7WK.01	0.933199	TCGA.10.0927.01	0.91749
TCGA.MY.A5BD.01A	0.940328	TCGA.EY.A3L3.01	0.976095	TCGA.24.1603.01	0.907432
TCGA.VS.A957.01A	0.956862	NA	NA	TCGA.24.1425.01	0.650173
TCGA.DS.A0VL.01A	0.837237	TCGA.AJ.A3IA.01	0.744346	TCGA.09.1667.01	0.736328
TCGA.VS.A954.01A	0.845295	TCGA.EO.A22S.01	0.962083	TCGA.61.2104.01	0.791603
TCGA.BI.A0VS.01A	0.790287	TCGA.B5.A0JU.01	0.957171	TCGA.24.0970.01	0.837725
TCGA.C5.A1ME.01A	0.829807	TCGA.D1.A16B.01	0.81108	TCGA.24.1928.01	0.773322
TCGA.VS.A952.01A	0.944382	TCGA.AX.A3FX.01	0.847808	TCGA.24.1558.01	0.928159
TCGA.DR.A0ZM.01A	0.671061	TCGA.AX.A1CF.01	0.919712	TCGA.13.0795.01	0.680852
TCGA.VS.A8QF.01A	0.784875	TCGA.A5.A0GA.01	0.864208	TCGA.29.2427.01	0.542627
TCGA.EK.A2H0.01A	0.912291	TCGA.SJ.A6ZJ.01	0.872211	TCGA.25.1323.01	0.895507
TCGA.DG.A2KM.01A	0.372609	TCGA.AX.A3FT.01	0.679098	TCGA.61.1911.01	0.711802
TCGA.VS.A8EL.01A	0.652872	TCGA.AP.A0LD.01	0.908273	TCGA.29.2428.01	0.761447
TCGA.IR.A3LB.01A	0.780946	TCGA.AJ.A3OL.01	0.980659	TCGA.09.1665.01	0.853916
TCGA.VS.A9UZ.01A	0.875528	TCGA.AP.A052.01	0.834725	TCGA.09.0364.01	0.989087
TCGA.C5.A1M5.01A	0.779569	TCGA.D1.A15X.01	0.829296	TCGA.13.1492.01	0.957622
TCGA.ZJ.A8QQ.01A	0.901721	TCGA.EY.A1GW.01	0.919822	TCGA.30.1891.01	0.692565
TCGA.C5.A1BE.01B	0.856822	TCGA.B5.A3FB.01	0.917459	TCGA.13.1506.01	0.918757
TCGA.UC.A7PI.01A	0.938242	TCGA.EY.A72D.01	0.938136	TCGA.57.1583.01	0.908853
TCGA.C5.A2LT.01A	0.73797	TCGA.B5.A11V.01	0.908572	TCGA.04.1514.01	0.982935
TCGA.C5.A2LV.01A	0.752571	TCGA.EY.A2OP.01	0.956279	TCGA.09.2044.01	0.778206
TCGA.C5.A2LY.01A	0.671559	TCGA.BS.A0TD.01	0.869455	TCGA.24.1423.01	0.874439
TCGA.IR.A3LH.01A	0.470852	TCGA.B5.A11J.01	0.88673	TCGA.30.1718.01	0.733969
TCGA.IR.A3LI.01A	0.979972	TCGA.BG.A0MK.01	0.858418	TCGA.13.0886.01	0.619088
TCGA.DG.A2KK.01A	0.863631	TCGA.D1.A17B.01	0.594079	TCGA.20.0991.01	0.580037
TCGA.C5.A1BM.01A	0.685314	TCGA.AX.A3G3.01	0.688538	TCGA.24.1464.01	0.846081
TCGA.C5.A2LX.01A	0.626698	TCGA.FI.A2D0.01	0.890938	TCGA.13.1488.01	0.827415
TCGA.DR.A0ZL.01A	0.937907	TCGA.BG.A0YU.01	0.912511	TCGA.24.1847.01	0.66157
TCGA.UC.A7PF.01A	0.664812	TCGA.AJ.A3EK.01	0.760976	TCGA.25.1316.01	0.893967
TCGA.C5.A7UI.01A	0.727811	TCGA.B5.A11F.01	0.89952	TCGA.04.1341.01	0.896199
TCGA.DG.A2KJ.01A	0.717465	TCGA.AX.A06L.01	0.7362	TCGA.13.1485.01	0.784643
TCGA.IR.A3LF.01A	0.849218	TCGA.EO.A3AY.01	0.779794	TCGA.24.2254.01	0.801723
TCGA.C5.A8XK.01A	0.882091	TCGA.A5.A0GG.01	0.78632	TCGA.25.2399.01	0.752369
TCGA.C5.A2LZ.01A	0.857249	TCGA.A5.A0GN.01	0.721484	TCGA.13.1511.01	0.860082
TCGA.C5.A7CJ.01A	0.655238	TCGA.BG.A220.01	0.969858	TCGA.30.1860.01	0.677051
TCGA.EK.A2IR.01A	0.973538	TCGA.D1.A1NY.01	0.854755	TCGA.25.2400.01	0.90399
TCGA.DS.A0VM.01A	0.801162	TCGA.AP.A059.01	0.649679	TCGA.24.1435.01	0.70381
TCGA.DS.A0VN.01A	0.614867	TCGA.FI.A2F8.01	0.865583	TCGA.61.2009.01	0.68984
TCGA.DS.A1OD.01A	0.598782	TCGA.AX.A06H.01	0.58267	TCGA.36.1569.01	0.635768
TCGA.IR.A3LC.01A	0.857507	TCGA.AP.A0L9.01	0.944901	TCGA.23.1116.01	0.577454
TCGA.C5.A7UH.01A	0.837595	TCGA.A5.A7WJ.01	0.983822	TCGA.04.1350.01	0.976558
TCGA.C5.A7CK.01A	0.898014	TCGA.AX.A1CI.01	0.942447	TCGA.23.2077.01	0.781718
TCGA.IR.A3LA.01A	0.867479	TCGA.D1.A1NU.01	0.884508	TCGA.24.1416.01	0.897637
TCGA.C5.A1BJ.01A	0.749006	TCGA.H5.A2HR.01	0.852893	TCGA.09.1673.01	0.88344
TCGA.C5.A8XJ.01A	0.807192	TCGA.AX.A1CR.01	0.852835	TCGA.09.2054.01	0.869896
TCGA.C5.A7CO.01A	0.886878	TCGA.DI.A1NO.01	0.972608	TCGA.24.1428.01	0.762007
TCGA.IR.A3L7.01A	0.93815	TCGA.E6.A8L9.01	0.783228	TCGA.25.2398.01	0.719342
TCGA.C5.A7CH.01A	0.881299	TCGA.A5.A0G9.01	0.861619	TCGA.09.1669.01	0.826258
TCGA.C5.A7UE.01A	0.904353	TCGA.DF.A2KZ.01	0.767399	TCGA.29.1778.01	0.813638
TCGA.C5.A905.01A	0.937131	TCGA.BG.A2L7.01	0.757101	TCGA.24.1563.01	0.694825
TCGA.C5.A1BL.01A	0.816847	TCGA.B5.A1MZ.01	0.79387	TCGA.25.2401.01	0.555872
TCGA.C5.A1BK.01B	0.645023	TCGA.B5.A1MR.01	0.576714	TCGA.09.1661.01	0.862283
TCGA.JX.A3Q0.01A	0.780981	TCGA.D1.A176.01	0.897164	TCGA.36.1581.01	0.725123
TCGA.C5.A7CG.01A	0.596313	TCGA.B5.A1MU.01	0.636804	TCGA.09.1670.01	0.833265
		TCGA.AX.A3G6.01	0.914447	TCGA.10.0936.01	0.913353
		TCGA.BG.A0MG.01	0.889067	TCGA.23.1024.01	0.9568
		TCGA.E6.A1LX.01	0.947581	TCGA.04.1364.01	0.989159
		TCGA.BS.A0WQ.01	0.942274	TCGA.61.1724.01	0.832418
		TCGA.A5.A1OK.01	0.845594	TCGA.13.0908.01	0.692437
		TCGA.D1.A0ZR.01	0.940511	TCGA.25.1319.01	0.833104
		TCGA.K6.A3WQ.01	0.913393	TCGA.23.1023.01	0.722257
		TCGA.D1.A17L.01	0.800375	TCGA.24.1844.01	0.946015
		TCGA.D1.A3JQ.01	0.861225	TCGA.36.1576.01	0.572088
		TCGA.D1.A15V.01	0.901394	TCGA.31.1959.01	0.610735
		TCGA.D1.A1NX.01	0.907412	TCGA.24.1562.01	0.779392
		TCGA.PG.A7D5.01	0.930021	TCGA.09.0369.01	0.862669
		TCGA.AX.A063.01	0.698302	TCGA.61.1721.01	0.595617
		TCGA.EY.A54A.01	0.786581	TCGA.29.2425.01	0.889945
		TCGA.B5.A1MX.01	0.820335	TCGA.24.2033.01	0.841407
		TCGA.FI.A2EX.01	0.916185	TCGA.61.2111.01	0.849793
		TCGA.AP.A1E4.01	0.954657	TCGA.13.0885.01	0.678828
		TCGA.A5.A2K3.01	0.44541	TCGA.24.1843.01	0.743811
		TCGA.AJ.A3NF.01	0.671344	TCGA.13.1477.01	0.916524
		TCGA.BK.A0CA.01	0.900361	TCGA.25.1635.01	0.690268
		TCGA.BS.A0UA.01	0.710833	TCGA.25.1632.01	0.966394
		TCGA.D1.A1O0.01	0.939802	TCGA.25.1634.01	0.981923
		TCGA.EO.A2CG.01	0.885696	TCGA.30.1853.01	0.982991
		TCGA.EY.A1GU.01	0.905378	TCGA.25.1631.01	0.899141
		TCGA.DF.A2KS.01	0.854286	TCGA.36.1574.01	0.772133
		TCGA.AJ.A3BG.01	0.938075	TCGA.13.1411.01	0.468892
		TCGA.A5.A0VQ.01	0.854317	TCGA.13.0724.01	0.864636
		TCGA.B5.A3FA.01	0.913101	TCGA.61.2102.01	0.790467
		TCGA.B5.A11H.01	0.758817	TCGA.13.0916.01	0.867393
		TCGA.AP.A1E3.01	0.815141	TCGA.13.0923.01	0.878744
		TCGA.D1.A17C.01	0.707258	TCGA.57.1586.01	0.916387
		TCGA.B5.A0K8.01	0.868671	TCGA.25.1627.01	0.894199
		TCGA.A5.A0GJ.01	0.753481	TCGA.61.1998.01	0.73152
		TCGA.AX.A2HK.01	0.934695	TCGA.13.0888.01	0.971281
		TCGA.AP.A1DH.01	0.766833	TCGA.13.0762.01	0.930805
		TCGA.AX.A1CA.01	0.892614	TCGA.24.0979.01	0.922765
		TCGA.PG.A917.01	0.79255	TCGA.04.1356.01	0.878528
		TCGA.BK.A0CB.01	0.714615	TCGA.09.2045.01	0.886197
		TCGA.BG.A221.01	0.76342	TCGA.29.1769.01	0.777891
		TCGA.KP.A3W3.01	0.795023	TCGA.09.1668.01	0.74493
		TCGA.BG.A0MH.01	0.655753	TCGA.OY.A56Q.01	0.986259
		TCGA.FI.A2D5.01	0.84965	TCGA.24.1470.01	0.712263
		TCGA.AX.A1CC.01	0.583068	TCGA.57.1994.01	0.787893
		TCGA.B5.A1MS.01	0.951996	TCGA.24.2271.01	0.718482
		TCGA.BG.A187.01	0.85673	TCGA.30.1861.01	0.840178
		TCGA.D1.A17N.01	0.686822	TCGA.09.1662.01	0.765264
		TCGA.B5.A11Y.01	0.725954	TCGA.24.1552.01	0.915071
		TCGA.AX.A05W.01	0.811213	TCGA.24.1424.01	0.849226
		TCGA.EY.A1H0.01	0.969214	TCGA.13.0804.01	0.771652
		TCGA.D1.A1O5.01	0.870352	TCGA.24.1553.01	0.654279
		TCGA.D1.A1NS.01	0.891609	TCGA.61.2101.01	0.852673
		TCGA.D1.A16I.01	0.855641	TCGA.29.1691.01	0.871085
		TCGA.AX.A3FZ.01	0.948612	TCGA.24.1422.01	0.648548
		TCGA.AX.A3GI.01	0.97953	TCGA.29.1768.01	0.528517
		TCGA.D1.A179.01	0.944646	TCGA.25.1312.01	0.86819
		TCGA.EY.A1G8.01	0.961622	TCGA.24.1434.01	0.581581
		TCGA.EY.A1GI.01	0.870604	TCGA.20.0987.01	0.632881
		TCGA.A5.A0G2.01	0.82162	TCGA.61.1741.01	0.86005
		TCGA.D1.A101.01	0.654444	TCGA.29.1761.01	0.795958
		TCGA.D1.A17S.01	0.910733	TCGA.24.2293.01	0.562058
		TCGA.AJ.A3NC.01	0.900489	TCGA.24.2026.01	0.807249
		TCGA.E6.A2P8.01	0.739355	TCGA.31.1946.01	0.681409
		TCGA.AX.A3FW.01	0.959519	TCGA.13.0911.01	0.659894
		TCGA.KP.A3W0.01	0.794357	TCGA.25.2409.01	0.722347
		TCGA.B5.A11M.01	0.775512	TCGA.24.1471.01	0.871336
		TCGA.E6.A1M0.01	0.877476	TCGA.59.A5PD.01	0.915883
		TCGA.AX.A2HA.01	0.890494	TCGA.61.1918.01	0.813609
		TCGA.AX.A2IN.01	0.75399	TCGA.13.0920.01	0.926013
		TCGA.D1.A0ZO.01	0.77645	TCGA.29.1785.01	0.697912
		TCGA.D1.A16S.01	0.899953	TCGA.13.1499.01	0.615438
		TCGA.AP.A051.01	0.867529	TCGA.13.0887.01	0.869169
		TCGA.D1.A2G6.01	0.824464	TCGA.25.1633.01	0.654337
		TCGA.AJ.A3OK.01	0.601968	TCGA.24.1567.01	0.973176
		TCGA.D1.A17K.01	0.930771	TCGA.57.1993.01	0.881188
		TCGA.D1.A3DH.01	0.967707	TCGA.29.1784.01	0.739219
		TCGA.BG.A0MO.01	0.863811	TCGA.30.1714.01	0.91983
		TCGA.D1.A1O7.01	0.916817	TCGA.57.1582.01	0.869803
		TCGA.B5.A0JV.01	0.936577	TCGA.61.2012.01	0.746008
		TCGA.AX.A064.01	0.877608	TCGA.13.1510.01	0.879479
		TCGA.AX.A1CN.01	0.939529	TCGA.VG.A8LO.01	0.960992
		TCGA.B5.A0K4.01	0.921734	TCGA.23.2078.01	0.717674
		TCGA.FI.A2EY.01	0.952388	TCGA.09.1666.01	0.822533
		TCGA.D1.A0ZV.01	0.71277	TCGA.29.1777.01	0.693469
		TCGA.AX.A06D.01	0.944139	TCGA.61.2110.01	0.907981
		TCGA.AP.A05P.01	0.839561	TCGA.29.1776.01	0.831981
		TCGA.EY.A214.01	0.791121
		TCGA.A5.A0GW.01	0.648539
		TCGA.EY.A3QX.01	0.885057
		TCGA.EO.A3L0.01	0.904426
		TCGA.B5.A5OC.01	0.61673
		TCGA.EO.A2CH.01	0.943336
		TCGA.A5.A0GP.01	0.899723
		TCGA.EO.A22Y.01	0.910989
		TCGA.AX.A05Z.01	0.670239
		TCGA.B5.A11I.01	0.740694
		TCGA.EO.A22U.01	0.936613
		TCGA.BS.A0TC.01	0.901914
		TCGA.B5.A0K9.01	0.85176
		TCGA.AX.A3G1.01	0.79457
		TCGA.D1.A16G.01	0.91942
		TCGA.AP.A0LN.01	0.876607
		TCGA.EO.A22X.01	0.795043
		TCGA.JU.AAVI.01	0.749919
		TCGA.AJ.A3NH.01	0.94874
		TCGA.A5.A3LO.01	0.917651
		TCGA.BG.A3EW.01	0.932541
		TCGA.D1.A3DG.01	0.966013
		TCGA.AX.A2H4.01	0.61024
		TCGA.AJ.A3TW.01	0.759121
		TCGA.AP.A3K1.01	0.889578
		TCGA.AX.A3GB.01	0.804041
		TCGA.FI.A3PX.01	0.957231
		TCGA.QF.A5YS.01	0.898029
		TCGA.D1.A168.01	0.846881
		TCGA.FI.A2CX.01	0.373323
		TCGA.AX.A2H5.01	0.940307
		TCGA.AX.A1C9.01	0.843237
		TCGA.DI.A2QT.01	0.925851
		TCGA.AX.A3G8.01	0.953944
		TCGA.AW.A1PO.01	0.959964
		TCGA.EO.A3AV.01	0.699199
		TCGA.AX.A2HG.01	0.849803
		TCGA.KP.A3W4.01	0.817304
		TCGA.A5.A0GQ.01	0.773149
		TCGA.A5.A1OH.01	0.942862
		TCGA.D1.A16F.01	0.828752
		TCGA.B5.A11R.01	0.897327
		TCGA.D1.A17F.01	0.821638
		TCGA.AX.A2IO.01	0.849352
		TCGA.EC.A1QX.01	0.755734
		TCGA.AP.A054.01	0.968274
		TCGA.BG.A0M6.01	0.964666
		TCGA.2E.A9G8.01	0.90775
		TCGA.B5.A5OE.01	0.941102
		TCGA.B5.A0JT.01	0.885164
		TCGA.AP.A0LP.01	0.818007
		TCGA.DI.A1BY.01	0.746192
		TCGA.B5.A1MY.01	0.865072
		TCGA.EY.A1GQ.01	0.861339
		TCGA.BG.A0MU.01	0.8292
		TCGA.SJ.A6ZI.01	0.735459
		TCGA.AX.A0J1.01	0.868763
		TCGA.BS.A0V8.01	0.815571
		TCGA.AP.A0LM.01	0.608326
		TCGA.BS.A0TG.01	0.719195
		TCGA.BG.A0MQ.01	0.941218
		TCGA.AP.A0LV.01	0.833876
		TCGA.EY.A1GO.01	0.972745
		TCGA.B5.A0JZ.01	0.68135
		TCGA.AX.A060.01	0.957698
		TCGA.AX.A2HH.01	0.982812
		TCGA.EO.A3AZ.01	0.609489
		TCGA.DF.A2KU.01	0.694597
		TCGA.B5.A0K6.01	0.803144
		TCGA.AP.A0LL.01	0.850724
		TCGA.A5.A2K4.01	0.866574
		TCGA.D1.A163.01	0.829571
		TCGA.D1.A17M.01	0.883647
		TCGA.B5.A0K0.01	0.712949
		TCGA.BG.A0M9.01	0.903768
		TCGA.BG.A0MT.01	0.813621
		TCGA.B5.A0K7.01	0.789137
		TCGA.A5.A0VO.01	0.831378
		TCGA.AJ.A3BK.01	0.781015
		TCGA.D1.A102.01	0.813961
		TCGA.AJ.A8CV.01	0.811434
		TCGA.FI.A2D4.01	0.917767
		TCGA.AP.A0LO.01	0.894284
		TCGA.A5.A0GR.01	0.642821
		TCGA.AX.A0IS.01	0.884024
		TCGA.E6.A2P9.01	0.910492
		TCGA.BS.A0TJ.01	0.871543
		TCGA.AJ.A2QK.01	0.708317
		TCGA.AP.A0LS.01	0.89543
		TCGA.AP.A0LE.01	0.896797
		TCGA.AX.A2HJ.01	0.812346
		TCGA.AJ.A3EM.01	0.968702
		TCGA.EO.A22T.01	0.80508
		TCGA.A5.A0RA.01	0.879195
		TCGA.AJ.A3EL.01	0.768103
		TCGA.D1.A16O.01	0.913472
		TCGA.A5.A0GB.01	0.936563
		TCGA.D1.A16Q.01	0.771563
		TCGA.BG.A222.01	0.90293
		TCGA.PG.A916.01	0.894409
		TCGA.AX.A1C5.01	0.929167
		TCGA.PG.A915.01	0.95364
		TCGA.AX.A2HD.01	0.914192
		TCGA.BG.A18B.01	0.84032
		TCGA.AP.A1E1.01	0.896407
		TCGA.A5.A3LP.01	0.879899
		TCGA.AP.A1DV.01	0.936201
		TCGA.BS.A0TI.01	0.7634
		TCGA.AX.A2H2.01	0.845727
		TCGA.AX.A05S.01	0.795757
		TCGA.D1.A162.01	0.895198
		TCGA.D1.A0ZS.01	0.904805
		TCGA.BS.A0V6.01	0.827166
		TCGA.KP.A3W1.01	0.630262
		TCGA.D1.A0ZU.01	0.915592
		TCGA.D1.A3DA.01	0.908104
		TCGA.AP.A05H.01	0.906684
		TCGA.D1.A16N.01	0.851899
		TCGA.AP.A05D.01	0.742263
		TCGA.BG.A2AE.01	0.827369
		TCGA.AX.A1CJ.01	0.822162
		TCGA.AP.A5FX.01	0.865939
		TCGA.EY.A210.01	0.77573
		TCGA.D1.A169.01	0.69683
		TCGA.PG.A914.01	0.877911
		TCGA.BG.A0M2.01	0.877505
		TCGA.D1.A1NW.01	0.879378
		TCGA.AJ.A8CW.01	0.871307
		TCGA.EY.A1GC.01	0.768319
		TCGA.A5.A0GV.01	0.96734
		TCGA.BS.A0UM.01	0.774481
		TCGA.B5.A5OD.01	0.812826
		TCGA.A5.A0GM.01	0.875841
		TCGA.FI.A2CY.01	0.751091
		TCGA.EY.A1GR.01	0.802101
		TCGA.B5.A0JR.01	0.830205
		TCGA.5S.A9Q8.01	0.907473
		TCGA.AP.A1DQ.01	0.890157
		TCGA.AX.A05U.01	0.917125
		TCGA.BS.A0UL.01	0.630318
		TCGA.D1.A16E.01	0.825701
		TCGA.AX.A0IZ.01	0.711832
		TCGA.DI.A1NN.01	0.764975
		TCGA.AJ.A23O.01	0.740012
		TCGA.AP.A0L8.01	0.948466
		TCGA.BS.A0T9.01	0.814438
		TCGA.A5.A1OJ.01	0.62849
		TCGA.BK.A13C.01	0.920069
		TCGA.EO.A3KX.01	0.956497
		TCGA.D1.A15Z.01	0.920309
		TCGA.D1.A16D.01	0.808945
		TCGA.EO.A1Y5.01	0.771067
		TCGA.AJ.A23N.01	0.753287
		TCGA.AJ.A3EJ.01	0.779208
		TCGA.EY.A1GL.01	0.900316
		TCGA.B5.A3F9.01	0.838795
		TCGA.D1.A16R.01	0.785974
		TCGA.B5.A11Z.01	0.932806
		TCGA.AP.A05O.01	0.841784
		TCGA.D1.A1NZ.01	0.860995
		TCGA.EY.A1GV.01	0.836322
		TCGA.D1.A103.01	0.837015
		TCGA.EO.A3KU.01	0.929595
		TCGA.B5.A0K2.01	0.651541
		TCGA.AJ.A2QN.01	0.90375
		TCGA.D1.A160.01	0.790573
