# Supplementary material for: Tumor purity as a prognosis and immunotherapy relevant feature in cervical cancer
Source: Aging (Albany NY). 2021 Nov 29;13(22):24768–85. doi: 10.18632/aging.203714 (PMC8660621; doi:10.18632/aging.203714)
Supplement: Supplementary Table 3 [file aging-13-203714-s004.xlsx]

## Sheet: Supplementary Table 3
Supplementary Table 3. Univ_cox analysis of activated B cell-related genes in TCGA_CESC (p < 0.05).
Symbol	beta	HR (95% CI for HR)	wald.test	p.value
IKZF3	-0.49	0.61 (0.48-0.78)	16	5.5e-05
CD6	-0.52	0.59 (0.46-0.77)	16	6.7e-05
TRBV28	-0.31	0.73 (0.63-0.86)	15	0.00013
CCR7	-0.41	0.66 (0.53-0.82)	15	0.00014
ZAP70	-0.41	0.66 (0.53-0.82)	14	0.00014
TRBC2	-0.29	0.75 (0.65-0.87)	14	0.00015
DPEP2	-0.81	0.44 (0.29-0.68)	14	0.00016
MAP4K1	-0.49	0.61 (0.47-0.79)	14	0.00018
TRAV8_3	-0.61	0.55 (0.4-0.75)	14	0.00022
BIN2	-0.43	0.65 (0.52-0.82)	14	0.00022
CD27	-0.34	0.71 (0.59-0.85)	13	0.00029
SEPTIN1	-0.51	0.6 (0.46-0.79)	13	0.00029
TRAV34	-1.8	0.16 (0.061-0.43)	13	0.0003
FOXP3	-0.5	0.61 (0.47-0.8)	13	0.00031
S1PR4	-0.43	0.65 (0.51-0.82)	13	0.00035
ARRDC5	-1.4	0.24 (0.11-0.53)	13	0.00039
TMC8	-0.46	0.63 (0.49-0.82)	13	0.0004
PILRA	-0.49	0.61 (0.47-0.8)	13	0.00041
ZBTB32	-0.87	0.42 (0.26-0.68)	12	0.00042
KLRB1	-0.4	0.67 (0.54-0.84)	12	0.00045
CD52	-0.3	0.74 (0.63-0.88)	12	0.00047
CLEC2D	-0.58	0.56 (0.4-0.77)	12	0.00047
GNG8	-0.52	0.59 (0.44-0.8)	12	0.00047
LILRA4	-0.85	0.43 (0.27-0.69)	12	0.00054
CD3E	-0.29	0.75 (0.63-0.88)	12	0.0006
LINC01281	-1.8	0.17 (0.062-0.47)	12	0.0006
APOBEC3H	-0.52	0.6 (0.44-0.8)	12	0.00066
TBC1D10C	-0.4	0.67 (0.53-0.85)	11	0.0007
CLECL1	-0.83	0.43 (0.27-0.7)	11	0.00072
CD3D	-0.26	0.77 (0.67-0.9)	11	0.0008
PLA2G2D	-0.34	0.71 (0.58-0.87)	11	0.00081
PRKCB	-0.57	0.56 (0.4-0.79)	11	0.00081
GTSF1L	-1.9	0.14 (0.045-0.45)	11	0.00084
TRBV20_1	-0.35	0.71 (0.58-0.87)	11	0.00088
CCL19	-0.19	0.83 (0.74-0.93)	11	0.00095
TRAC	-0.25	0.78 (0.67-0.9)	11	0.00096
ACAP1	-0.5	0.61 (0.45-0.82)	11	0.00099
CD2	-0.26	0.77 (0.66-0.9)	11	0.0011
TIGIT	-0.37	0.69 (0.55-0.86)	10	0.0012
LSP1	-0.27	0.76 (0.65-0.9)	10	0.0012
RIPOR2	-0.6	0.55 (0.38-0.79)	10	0.0012
CST7	-0.27	0.76 (0.65-0.9)	10	0.0014
LINC00426	-0.82	0.44 (0.27-0.73)	10	0.0014
CXCR6	-0.34	0.71 (0.58-0.88)	10	0.0015
TRGC2	-0.4	0.67 (0.53-0.86)	10	0.0015
TRBV12_4	-0.56	0.57 (0.4-0.81)	10	0.0015
LY9	-0.85	0.43 (0.25-0.73)	9.9	0.0016
TRAV12_1	-0.51	0.6 (0.44-0.82)	10	0.0016
CD7	-0.28	0.76 (0.64-0.9)	9.8	0.0017
TRBV2	-0.5	0.61 (0.44-0.83)	9.8	0.0017
NLRC3	-0.55	0.58 (0.41-0.81)	9.8	0.0017
SELL	-0.31	0.73 (0.61-0.89)	9.8	0.0018
LINC01857	-0.5	0.61 (0.44-0.83)	9.8	0.0018
SLAMF6	-0.35	0.7 (0.56-0.88)	9.6	0.002
TESPA1	-0.62	0.54 (0.36-0.8)	9.5	0.002
LAG3	-0.28	0.76 (0.64-0.9)	9.6	0.002
PCED1B_AS1	-0.37	0.69 (0.54-0.87)	9.4	0.0021
SH2D1A	-0.37	0.69 (0.54-0.87)	9.5	0.0021
PSTPIP1	-0.4	0.67 (0.52-0.87)	9.4	0.0021
NAPSB	-0.3	0.74 (0.61-0.9)	9.5	0.0021
WAS	-0.36	0.7 (0.55-0.88)	9.4	0.0022
PTPN7	-0.36	0.7 (0.55-0.88)	9.4	0.0022
SLA2	-0.35	0.7 (0.56-0.88)	9.4	0.0022
TRBV24_1	-0.67	0.51 (0.33-0.79)	9.4	0.0022
UBASH3A	-0.46	0.63 (0.47-0.85)	9.3	0.0023
TCL1A	-0.77	0.46 (0.28-0.76)	9.3	0.0023
TLR10	-0.76	0.47 (0.28-0.76)	9.3	0.0023
FCRL3	-0.75	0.47 (0.29-0.77)	9.2	0.0024
SPIB	-0.53	0.59 (0.42-0.83)	9.2	0.0024
P2RY8	-0.46	0.63 (0.47-0.85)	9.1	0.0025
JAML	-0.37	0.69 (0.55-0.88)	9.1	0.0025
IGSF6	-0.36	0.69 (0.55-0.88)	9.1	0.0025
NIBAN3	-2	0.13 (0.034-0.49)	9.1	0.0026
LOC107985688	-0.61	0.54 (0.37-0.81)	9	0.0028
PPP1R16B	-0.43	0.65 (0.49-0.86)	8.9	0.0028
JAK3	-0.37	0.69 (0.55-0.88)	8.9	0.0029
POU2AF1	-0.3	0.74 (0.61-0.9)	8.8	0.0029
ZBTB20_AS1	-2.8	0.064 (0.01-0.39)	8.9	0.0029
LINC00158	-2.6	0.078 (0.015-0.42)	8.9	0.0029
TTC24	-1	0.37 (0.19-0.71)	8.8	0.003
KLHL6	-0.57	0.57 (0.39-0.82)	8.8	0.0031
FGD3	-0.47	0.62 (0.45-0.85)	8.8	0.0031
CD3G	-0.37	0.69 (0.54-0.88)	8.7	0.0032
JAKMIP1	-0.56	0.57 (0.39-0.83)	8.7	0.0032
CLNK	-1.2	0.31 (0.15-0.68)	8.7	0.0032
CD5	-0.33	0.72 (0.57-0.89)	8.7	0.0033
ZNF831	-1.1	0.34 (0.17-0.7)	8.6	0.0033
CD48	-0.28	0.76 (0.63-0.91)	8.6	0.0034
TAF5LP1	-0.36	0.7 (0.55-0.89)	8.6	0.0034
CD8A	-0.24	0.79 (0.67-0.92)	8.6	0.0034
ASGR2	-1	0.36 (0.18-0.71)	8.6	0.0034
P2RY10	-0.45	0.64 (0.47-0.86)	8.5	0.0035
STAP1	-0.6	0.55 (0.37-0.82)	8.5	0.0035
ARHGAP15	-0.54	0.59 (0.41-0.84)	8.5	0.0036
RASAL3	-0.34	0.71 (0.57-0.89)	8.5	0.0036
PYHIN1	-0.47	0.63 (0.46-0.86)	8.5	0.0036
TRBV4_2	-0.39	0.68 (0.52-0.88)	8.5	0.0036
CHRM3_AS2	-1.1	0.33 (0.16-0.7)	8.5	0.0036
CASP4LP	-0.78	0.46 (0.27-0.78)	8.4	0.0037
TRBV5_1	-0.44	0.65 (0.48-0.87)	8.4	0.0038
LY86	-0.32	0.73 (0.59-0.9)	8.4	0.0038
CD19	-0.46	0.63 (0.46-0.86)	8.3	0.004
CXCR3	-0.29	0.75 (0.62-0.91)	8.3	0.004
MPEG1	-0.3	0.74 (0.61-0.91)	8.3	0.004
TRBC1	-0.53	0.59 (0.41-0.85)	8.3	0.004
GRAP2	-0.55	0.58 (0.4-0.84)	8.3	0.004
RHOH	-0.46	0.63 (0.46-0.86)	8.3	0.004
TRGC1	-0.76	0.47 (0.28-0.78)	8.3	0.004
TARP	-0.76	0.47 (0.28-0.78)	8.3	0.004
ICOS	-0.38	0.69 (0.53-0.89)	8.2	0.0041
SELPLG	-0.32	0.73 (0.59-0.9)	8.2	0.0041
TRBV12_3	-0.75	0.47 (0.28-0.79)	8.3	0.0041
IL12RB1	-0.37	0.69 (0.53-0.89)	8.2	0.0042
GIMAP7	-0.28	0.76 (0.63-0.92)	8.2	0.0043
TRBV6_5	-0.36	0.7 (0.54-0.89)	8.2	0.0043
IGFLR1	-0.52	0.59 (0.41-0.85)	8.2	0.0043
SIRPG	-0.3	0.74 (0.61-0.91)	8.1	0.0044
HNRNPA1P21	-0.34	0.71 (0.57-0.9)	8.1	0.0044
APOBEC3G	-0.3	0.74 (0.6-0.91)	8.1	0.0044
CRTAM	-0.44	0.65 (0.48-0.87)	8.1	0.0045
TRBV6_6	-0.52	0.6 (0.42-0.85)	8	0.0046
ITGB2_AS1	-0.41	0.66 (0.5-0.88)	8	0.0046
CD37	-0.31	0.73 (0.59-0.91)	8	0.0047
P2RY13	-0.39	0.68 (0.52-0.89)	8	0.0047
GNGT2	-0.43	0.65 (0.48-0.88)	8	0.0048
LCK	-0.3	0.74 (0.6-0.91)	8	0.0048
GZMK	-0.25	0.78 (0.65-0.93)	7.9	0.0049
GPR171	-0.33	0.72 (0.58-0.91)	7.9	0.0049
TRGV2	-0.64	0.53 (0.34-0.82)	7.9	0.0049
SLAMF1	-0.46	0.63 (0.46-0.87)	7.9	0.005
SNX20	-0.36	0.7 (0.54-0.9)	7.9	0.005
ARHGAP9	-0.33	0.72 (0.57-0.91)	7.9	0.005
TRG_AS1	-0.51	0.6 (0.42-0.86)	7.9	0.005
LINC02285	-1.3	0.28 (0.12-0.68)	7.9	0.005
HLA_DPB1	-0.21	0.81 (0.7-0.94)	7.9	0.005
BTLA	-0.78	0.46 (0.27-0.79)	7.8	0.0053
TRAT1	-0.47	0.62 (0.45-0.87)	7.8	0.0053
TRGV4	-0.63	0.53 (0.34-0.83)	7.8	0.0053
SIT1	-0.29	0.75 (0.61-0.92)	7.7	0.0054
LST1	-0.3	0.74 (0.6-0.92)	7.7	0.0054
TBX21	-0.44	0.65 (0.48-0.88)	7.8	0.0054
IGKV1_12	-0.25	0.78 (0.65-0.93)	7.8	0.0054
DBH_AS1	-0.37	0.69 (0.54-0.9)	7.7	0.0054
TRAV8_2	-0.56	0.57 (0.38-0.85)	7.7	0.0055
CD79B	-0.33	0.72 (0.57-0.91)	7.7	0.0056
TRAV4	-0.4	0.67 (0.51-0.89)	7.6	0.0057
FGD2	-0.46	0.63 (0.46-0.87)	7.6	0.0057
ITM2A	-0.28	0.76 (0.62-0.92)	7.5	0.006
TRAV16	-0.51	0.6 (0.42-0.86)	7.6	0.006
ACKR1	-0.21	0.81 (0.69-0.94)	7.6	0.006
TNFAIP8L2	-0.3	0.74 (0.6-0.92)	7.5	0.0061
TRGV3	-0.74	0.47 (0.28-0.81)	7.5	0.0061
IFI30	-0.63	0.53 (0.34-0.84)	7.5	0.0063
C16orf54	-0.33	0.72 (0.56-0.91)	7.4	0.0064
CORO1A	-0.29	0.75 (0.61-0.92)	7.4	0.0065
CCL5	-0.18	0.83 (0.73-0.95)	7.4	0.0066
GZMM	-0.27	0.77 (0.63-0.93)	7.4	0.0067
HEATR9	-2.3	0.1 (0.019-0.53)	7.3	0.0068
GZMH	-0.2	0.82 (0.71-0.95)	7.3	0.007
CD247	-0.3	0.74 (0.6-0.92)	7.3	0.007
MS4A1	-0.36	0.7 (0.54-0.91)	7.2	0.0071
TRBV19	-0.33	0.72 (0.56-0.91)	7.2	0.0071
C9orf139	-1.1	0.33 (0.14-0.74)	7.2	0.0071
ZNF683	-0.22	0.81 (0.69-0.94)	7.2	0.0071
FTH1P22	-0.39	0.68 (0.51-0.9)	7.2	0.0072
CXorf65	-0.61	0.54 (0.35-0.85)	7.2	0.0073
ANKRD55	-1.9	0.15 (0.037-0.6)	7.2	0.0073
TRBV29_1	-0.33	0.72 (0.56-0.91)	7.2	0.0074
PIK3CD_AS1	-3.2	0.043 (0.0042-0.43)	7.1	0.0075
TRBV30	-0.46	0.63 (0.45-0.89)	7.1	0.0076
HAVCR2	-0.28	0.75 (0.61-0.93)	7.1	0.0077
RUFY4	-0.4	0.67 (0.5-0.9)	7.1	0.0078
CD28	-0.54	0.58 (0.39-0.87)	7	0.008
TNFRSF13B	-0.66	0.52 (0.32-0.84)	7	0.0081
CLEC9A	-1.1	0.35 (0.16-0.76)	7	0.0081
IL10RA	-0.3	0.74 (0.6-0.93)	7	0.0082
CTLA4	-0.28	0.75 (0.61-0.93)	7	0.0082
SLFN12L	-0.61	0.55 (0.35-0.85)	7	0.0082
IL16	-0.43	0.65 (0.48-0.9)	6.9	0.0086
CLEC10A	-0.28	0.76 (0.62-0.93)	6.9	0.0086
TRAV9_2	-0.47	0.62 (0.44-0.89)	6.9	0.0088
TRBJ2_1	-0.26	0.77 (0.63-0.94)	6.9	0.0088
VCAM1	-0.25	0.78 (0.64-0.94)	6.9	0.0088
CD300LF	-0.35	0.7 (0.54-0.91)	6.8	0.0089
IGHM	-0.11	0.9 (0.82-0.97)	6.8	0.009
IL21R	-0.36	0.7 (0.53-0.91)	6.8	0.009
MS4A6A	-0.26	0.77 (0.63-0.94)	6.8	0.009
SP140	-0.38	0.68 (0.52-0.91)	6.8	0.0091
LINC00861	-0.63	0.53 (0.33-0.85)	6.8	0.0092
IKZF1	-0.34	0.71 (0.55-0.92)	6.7	0.0094
TRAV26_1	-0.66	0.51 (0.31-0.85)	6.7	0.0094
TRAV29DV5	-0.49	0.61 (0.43-0.89)	6.7	0.0094
GMFG	-0.28	0.76 (0.62-0.94)	6.7	0.0097
GIMAP4	-0.26	0.77 (0.64-0.94)	6.7	0.0099
ITGAL	-0.25	0.78 (0.64-0.94)	6.6	0.01
CYTIP	-0.28	0.76 (0.61-0.94)	6.6	0.01
RNASE6	-0.27	0.76 (0.62-0.94)	6.6	0.01
CD96	-0.3	0.74 (0.59-0.93)	6.6	0.01
FUT7	-0.48	0.62 (0.43-0.89)	6.6	0.01
TRAV14DV4	-0.45	0.63 (0.45-0.9)	6.6	0.01
SLA	-0.3	0.74 (0.59-0.93)	6.4	0.011
TIFAB	-0.87	0.42 (0.22-0.82)	6.4	0.011
BATF	-0.2	0.82 (0.7-0.95)	6.5	0.011
TRBV15	-0.62	0.54 (0.33-0.87)	6.4	0.011
CFP	-0.65	0.52 (0.32-0.86)	6.5	0.011
PTGDS	-0.16	0.85 (0.76-0.97)	6.4	0.011
VPREB3	-0.34	0.71 (0.54-0.93)	6.4	0.011
TRAV2	-0.4	0.67 (0.49-0.91)	6.5	0.011
CD74	-0.18	0.83 (0.73-0.96)	6.4	0.011
APOC1	-0.19	0.83 (0.72-0.96)	6.5	0.011
NCKAP1L	-0.31	0.73 (0.57-0.93)	6.4	0.012
SCML4	-0.67	0.51 (0.31-0.86)	6.3	0.012
PDCD1	-0.26	0.77 (0.63-0.94)	6.3	0.012
BFSP2	-1.4	0.25 (0.085-0.74)	6.2	0.012
TRAV13_1	-0.33	0.72 (0.56-0.93)	6.3	0.012
PARP15	-0.46	0.63 (0.44-0.9)	6.3	0.012
LINC02384	-0.81	0.45 (0.24-0.84)	6.3	0.012
SELP	-0.37	0.69 (0.51-0.92)	6.3	0.012
STAC3	-0.43	0.65 (0.47-0.91)	6.3	0.012
HLA_DRA	-0.18	0.84 (0.73-0.96)	6.2	0.012
RAMP3	-0.31	0.73 (0.58-0.93)	6.3	0.012
P2RY12	-0.71	0.49 (0.28-0.86)	6.3	0.012
SASH3	-0.25	0.78 (0.64-0.95)	6.2	0.013
PIM2	-0.35	0.7 (0.53-0.93)	6.2	0.013
ABI3	-0.27	0.76 (0.61-0.94)	6.2	0.013
DOK2	-0.26	0.77 (0.62-0.95)	6.2	0.013
TRBV18	-0.41	0.66 (0.48-0.92)	6.1	0.013
ITK	-0.39	0.68 (0.5-0.92)	6.2	0.013
GPR18	-0.48	0.62 (0.43-0.9)	6.2	0.013
NKG7	-0.17	0.84 (0.73-0.96)	6.2	0.013
TRBV6_1	-0.39	0.68 (0.5-0.92)	6.2	0.013
TMEM273	-0.42	0.66 (0.47-0.92)	6.1	0.013
MIR8071_1	-0.25	0.78 (0.64-0.95)	6.2	0.013
PRAM1	-0.49	0.61 (0.41-0.9)	6.2	0.013
LINC00996	-0.58	0.56 (0.35-0.88)	6.2	0.013
IL18BP	-0.35	0.7 (0.53-0.93)	6.2	0.013
TRBJ2_2	-0.31	0.74 (0.58-0.94)	6.1	0.013
AKNA	-0.38	0.69 (0.51-0.92)	6.1	0.013
RGL4	-0.75	0.47 (0.26-0.85)	6.2	0.013
CD79A	-0.18	0.84 (0.73-0.96)	6.1	0.014
BTK	-0.37	0.69 (0.51-0.93)	6	0.014
IGHG3	-0.11	0.9 (0.82-0.98)	6.1	0.014
CCR5	-0.24	0.79 (0.65-0.95)	6.1	0.014
TRBV10_3	-0.38	0.69 (0.51-0.93)	6.1	0.014
IGKV3_7	-0.21	0.81 (0.69-0.96)	6.1	0.014
C1orf54	-0.43	0.65 (0.46-0.91)	6.1	0.014
NFAM1	-0.34	0.71 (0.54-0.93)	6.1	0.014
TRBV7_3	-0.47	0.62 (0.43-0.91)	6.1	0.014
IFNG_AS1	-1.3	0.28 (0.1-0.77)	6.1	0.014
PLD4	-0.47	0.62 (0.43-0.91)	6	0.014
AIF1	-0.23	0.8 (0.67-0.96)	5.9	0.015
GAB3	-0.46	0.63 (0.43-0.91)	6	0.015
TRAV5	-0.49	0.61 (0.41-0.91)	5.9	0.015
PIK3R6	-0.47	0.63 (0.43-0.91)	5.9	0.015
IFNG	-0.26	0.77 (0.62-0.95)	5.9	0.015
TRBV23_1	-0.54	0.58 (0.38-0.9)	6	0.015
GIMAP1	-0.39	0.67 (0.49-0.93)	5.8	0.016
LAPTM5	-0.22	0.8 (0.67-0.96)	5.8	0.016
RAB33A	-0.44	0.64 (0.45-0.92)	5.8	0.016
FGL2	-0.22	0.8 (0.67-0.96)	5.8	0.016
LINC01781	-0.66	0.52 (0.3-0.88)	5.8	0.016
TRAV8_4	-0.48	0.62 (0.42-0.91)	5.8	0.016
LINC00528	-0.84	0.43 (0.22-0.85)	5.8	0.016
LGALS2	-0.22	0.81 (0.68-0.96)	5.8	0.016
CD226	-0.85	0.43 (0.21-0.85)	5.8	0.016
LINC02325	-3	0.05 (0.0043-0.57)	5.8	0.016
LINC02099	-2.7	0.07 (0.0079-0.61)	5.8	0.016
AMPD1	-1	0.36 (0.16-0.83)	5.8	0.016
TRBV5_5	-0.64	0.53 (0.31-0.89)	5.7	0.017
HAMP	-0.53	0.59 (0.38-0.91)	5.7	0.017
FERMT3	-0.27	0.77 (0.61-0.95)	5.6	0.018
FAM78A	-0.35	0.7 (0.53-0.94)	5.6	0.018
TNFRSF1B	-0.26	0.77 (0.62-0.96)	5.6	0.018
IGHV3_7	-0.2	0.82 (0.7-0.97)	5.6	0.018
TRAV12_2	-0.33	0.72 (0.55-0.94)	5.6	0.018
TRAV3	-0.44	0.64 (0.45-0.93)	5.6	0.018
KLRD1	-0.56	0.57 (0.36-0.91)	5.6	0.018
FCMR	-0.32	0.73 (0.56-0.95)	5.5	0.019
IGLV3_9	-0.13	0.88 (0.79-0.98)	5.5	0.019
CPNE5	-0.37	0.69 (0.51-0.94)	5.5	0.019
APOBR	-0.3	0.74 (0.57-0.95)	5.5	0.019
SLFN14	-4.1	0.017 (0.00056-0.52)	5.5	0.019
LINC00582	-0.52	0.6 (0.39-0.92)	5.4	0.02
ABCD2	-0.87	0.42 (0.2-0.87)	5.4	0.02
HCK	-0.23	0.8 (0.66-0.97)	5.4	0.02
SCIMP	-0.38	0.68 (0.5-0.94)	5.4	0.021
TRBV7_9	-0.22	0.8 (0.66-0.97)	5.4	0.021
TNFSF13B	-0.25	0.78 (0.63-0.96)	5.4	0.021
TRAV19	-0.31	0.73 (0.56-0.95)	5.3	0.021
TNFRSF9	-0.36	0.7 (0.51-0.95)	5.3	0.021
IL18RAP	-0.39	0.68 (0.49-0.94)	5.3	0.021
TRBJ2_7	-0.2	0.82 (0.69-0.97)	5.3	0.021
RASGRP2	-0.41	0.66 (0.47-0.94)	5.2	0.022
TRBV9	-0.3	0.74 (0.58-0.96)	5.3	0.022
CD38	-0.23	0.79 (0.65-0.97)	5.2	0.022
EOMES	-0.33	0.72 (0.54-0.95)	5.3	0.022
SSTR3	-1.3	0.27 (0.088-0.83)	5.3	0.022
CLEC4A	-0.31	0.73 (0.56-0.96)	5.3	0.022
CLEC12A	-0.37	0.69 (0.5-0.95)	5.3	0.022
HLA_DPA1	-0.16	0.85 (0.74-0.98)	5.2	0.022
IGKC	-0.099	0.91 (0.83-0.99)	5.2	0.023
CD86	-0.25	0.78 (0.63-0.97)	5.2	0.023
MIR155HG	-0.33	0.72 (0.54-0.96)	5.2	0.023
TRAV10	-0.57	0.56 (0.34-0.92)	5.2	0.023
RTP5	-1.8	0.17 (0.035-0.78)	5.2	0.023
SPN	-0.29	0.75 (0.58-0.96)	5.1	0.024
TYROBP	-0.19	0.83 (0.7-0.98)	5.1	0.024
ELMO1	-0.38	0.68 (0.49-0.95)	5.1	0.024
MIR8071_2	-0.17	0.84 (0.73-0.98)	5	0.025
CD84	-0.31	0.73 (0.56-0.96)	5	0.025
TRBV3_1	-0.33	0.72 (0.54-0.96)	5	0.025
SIGLEC8	-0.4	0.67 (0.47-0.95)	5	0.025
FCER2	-1.2	0.29 (0.098-0.86)	5	0.025
TRBJ2_3	-0.21	0.81 (0.68-0.97)	5	0.025
CEACAM21	-0.37	0.69 (0.5-0.96)	5	0.025
TREML1	-0.63	0.53 (0.31-0.93)	5	0.025
PTPN22	-0.28	0.76 (0.6-0.97)	5	0.025
HVCN1	-0.36	0.7 (0.51-0.96)	5	0.025
IGLC3	-0.099	0.91 (0.83-0.99)	5	0.026
WDFY4	-0.42	0.66 (0.46-0.95)	5	0.026
MYO1G	-0.3	0.74 (0.57-0.97)	4.9	0.026
SAMD3	-0.7	0.5 (0.27-0.92)	5	0.026
LINC01480	-0.43	0.65 (0.45-0.95)	5	0.026
MZB1	-0.15	0.86 (0.76-0.98)	4.9	0.027
HCST	-0.2	0.82 (0.68-0.98)	4.9	0.027
PTPRC	-0.2	0.81 (0.68-0.98)	4.9	0.027
NCF1C	-0.3	0.74 (0.57-0.97)	4.9	0.027
RGS1	-0.17	0.84 (0.73-0.98)	4.9	0.027
EVI2A	-0.25	0.78 (0.62-0.97)	4.8	0.028
GIMAP5	-0.75	0.47 (0.24-0.92)	4.8	0.028
RCSD1	-0.27	0.77 (0.6-0.97)	4.8	0.028
NUGGC	-0.55	0.58 (0.35-0.94)	4.8	0.028
TRBV5_4	-0.37	0.69 (0.49-0.96)	4.8	0.028
LINC01215	-0.67	0.51 (0.28-0.93)	4.8	0.028
IL9R	-0.59	0.56 (0.33-0.94)	4.8	0.028
MYO1F	-0.28	0.75 (0.58-0.97)	4.8	0.029
IGLC2	-0.1	0.9 (0.82-0.99)	4.8	0.029
LILRB4	-0.22	0.8 (0.65-0.98)	4.8	0.029
LCT_AS1	-2	0.14 (0.024-0.82)	4.8	0.029
TRBV11_3	-0.83	0.44 (0.21-0.92)	4.8	0.029
HTRA4	-0.48	0.62 (0.4-0.95)	4.8	0.029
IL2RG	-0.17	0.84 (0.72-0.98)	4.7	0.03
AOAH	-0.23	0.79 (0.65-0.98)	4.7	0.03
ADA2	-0.19	0.83 (0.7-0.98)	4.7	0.03
MS4A7	-0.25	0.78 (0.62-0.98)	4.7	0.03
HLA_DRB1	-0.14	0.87 (0.76-0.99)	4.7	0.03
CD244	-0.35	0.71 (0.52-0.97)	4.7	0.03
CALHM6	-0.18	0.84 (0.71-0.98)	4.7	0.03
IL27	-0.76	0.47 (0.24-0.93)	4.7	0.03
GPBAR1	-0.76	0.47 (0.23-0.93)	4.7	0.03
CCR2	-0.32	0.72 (0.54-0.97)	4.6	0.031
CD53	-0.2	0.82 (0.69-0.98)	4.7	0.031
PTCRA	-0.61	0.55 (0.31-0.95)	4.7	0.031
FCRL1	-1	0.35 (0.14-0.91)	4.6	0.031
GPR183	-0.21	0.81 (0.67-0.98)	4.6	0.031
CELF2	-0.29	0.75 (0.57-0.97)	4.7	0.031
BLK	-0.6	0.55 (0.31-0.95)	4.6	0.032
CD4	-0.19	0.82 (0.69-0.98)	4.6	0.032
ARHGAP30	-0.25	0.78 (0.62-0.98)	4.6	0.032
CD80	-0.48	0.62 (0.4-0.96)	4.6	0.032
RPL4P1	-0.91	0.4 (0.17-0.92)	4.6	0.032
LOC107986115	-5.6	0.0038 (2.4e-05-0.62)	4.6	0.032
EVI2B	-0.22	0.81 (0.66-0.98)	4.6	0.033
ICAM3	-0.37	0.69 (0.49-0.97)	4.5	0.033
JCHAIN	-0.11	0.9 (0.81-0.99)	4.5	0.033
GPR65	-0.36	0.7 (0.5-0.97)	4.5	0.033
GVINP1	-0.42	0.66 (0.45-0.97)	4.5	0.033
LAT2	-0.37	0.69 (0.49-0.97)	4.6	0.033
ZC3H12D	-0.53	0.59 (0.36-0.96)	4.5	0.034
FASLG	-0.23	0.79 (0.64-0.98)	4.5	0.034
IGHG2	-0.093	0.91 (0.84-0.99)	4.4	0.035
MFNG	-0.29	0.74 (0.56-0.98)	4.4	0.036
PLA2G7	-0.21	0.81 (0.67-0.99)	4.4	0.036
TRAV20	-0.48	0.62 (0.4-0.97)	4.4	0.036
AGAP2	-0.35	0.7 (0.5-0.98)	4.3	0.037
IL12B	-0.86	0.42 (0.19-0.95)	4.3	0.037
LOC102723692	-0.51	0.6 (0.37-0.97)	4.3	0.037
LYZ	-0.14	0.87 (0.77-0.99)	4.4	0.037
IGLV3_21	-0.093	0.91 (0.83-1)	4.3	0.038
TLR7	-0.38	0.68 (0.48-0.98)	4.3	0.038
GPR174	-0.32	0.73 (0.54-0.98)	4.3	0.038
CASS4	-0.59	0.56 (0.32-0.97)	4.3	0.038
C1orf162	-0.26	0.77 (0.6-0.99)	4.3	0.039
TRAV8_6	-0.33	0.72 (0.53-0.98)	4.2	0.039
TRAV41	-0.39	0.68 (0.47-0.98)	4.2	0.039
TRAV1_2	-0.37	0.69 (0.49-0.98)	4.3	0.039
CD72	-0.29	0.74 (0.56-0.99)	4.2	0.04
IGKV1D_16	-0.16	0.85 (0.73-0.99)	4.2	0.04
TMEM244	-1.4	0.25 (0.069-0.94)	4.2	0.04
IRF4	-0.26	0.77 (0.6-0.99)	4.2	0.041
TRAV25	-0.56	0.57 (0.34-0.98)	4.2	0.041
TRBV4_1	-0.28	0.76 (0.58-0.99)	4.2	0.041
PNOC	-0.39	0.67 (0.46-0.98)	4.2	0.041
IGKV1_9	-0.099	0.91 (0.82-1)	4.1	0.042
CD33	-0.5	0.6 (0.37-0.98)	4.1	0.042
NCF4	-0.24	0.79 (0.63-0.99)	4.1	0.042
TRBV5_6	-0.33	0.72 (0.52-0.99)	4.1	0.042
ITGB2	-0.19	0.82 (0.68-0.99)	4.1	0.043
C1QA	-0.14	0.87 (0.76-1)	4.1	0.043
TRBV11_2	-0.32	0.73 (0.53-0.99)	4.1	0.043
SIGLEC1	-0.22	0.81 (0.65-0.99)	4.1	0.043
CTSW	-0.16	0.86 (0.74-1)	4.1	0.043
XCR1	-0.48	0.62 (0.39-0.99)	4.1	0.043
APBB1IP	-0.23	0.8 (0.64-0.99)	4	0.044
IGKV3_15	-0.099	0.91 (0.82-1)	4	0.044
DOCK2	-0.28	0.76 (0.58-0.99)	4	0.045
SPI1	-0.2	0.82 (0.68-1)	4	0.045
C1QB	-0.13	0.88 (0.77-1)	4	0.045
MIR4539	-0.28	0.76 (0.57-0.99)	4	0.045
PEAK3	-0.85	0.43 (0.19-0.98)	4	0.045
SLAMF8	-0.19	0.83 (0.69-1)	4	0.046
CD40LG	-0.33	0.72 (0.52-1)	4	0.047
CXCL13	-0.11	0.9 (0.8-1)	3.9	0.047
IGLC6	-0.21	0.81 (0.65-1)	3.9	0.047
GAPT	-0.46	0.63 (0.4-0.99)	4	0.047
TRAV38_1	-0.65	0.52 (0.28-0.99)	3.9	0.047
ZNF80	-1.1	0.34 (0.11-0.99)	3.9	0.048
GYPC	-0.24	0.78 (0.62-1)	3.9	0.049
IGHV3_33	-0.099	0.91 (0.82-1)	3.9	0.049
IGHV1_69	-0.11	0.9 (0.81-1)	3.9	0.049
